## RESEARCH ARTICLE

## Factors associated with early-onset androgenetic alopecia: A scoping review

Li-Ping Liu<sup>1,2</sup>\*, Mary Adumo Wariboko<sup>1,2</sup>, Xiao Hu<sup>3</sup>, Zi-Han Wang<sup>1,2</sup>, Qian Wu<sup>1,2</sup>, Yu-Mei Li<sup>1,2</sup>\*

**1** Department of Dermatology, Affiliated Hospital of Jiangsu University, Zhenjiang, Jiangsu, China, **2** Institute of Regenerative Medicine, Jiangsu University, Zhenjiang, Jiangsu, China, **3** Department of Urology, The First People's Hospital of Zhenjiang, Zhenjiang, Jiangsu, China

\* These authors contributed equally to this work.

\* [liuliping@ujs.edu.cn](mailto:liuliping@ujs.edu.cn) (LPL); [l.yumei@aliyun.com](mailto:l.yumei@aliyun.com) (YML)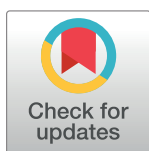

## Abstract

## Background

Early-onset androgenetic alopecia (AGA) has been associated with various chronic conditions, including metabolic syndrome (MetS). Gaining a deep understanding of early-onset AGA may enable earlier intervention in individuals at high risks. This scoping review aims to explore the risk factors and etiology, associated conditions, and adverse effects on wellbeing in early-onset AGA.

## Methods

Electronic literature searches were conducted in MEDLINE, EMBASE and CENTRAL. Eligible studies included case-control, cohort, cross-sectional, and meta-analysis studies. Selected studies needed to clearly define early-onset AGA cases or include only cases starting before the age of 40 and compare them with appropriate controls. The exclusion criteria comprised editorials, commentaries, case series, and non-systematic reviews, among others. Data extraction involved collecting study characteristics, methodologies, main outcomes, and findings. Descriptive tables were used to summarize key information and relevant variables when necessary.

## Results

Among the 65 eligible articles, 67.69% were case-control studies and 78.46% evaluated only male patients. "Early-onset" was defined as cases developing before the age of 30 years in 43.08% of the studies. The Hamilton–Norwood scale was the most frequently used method for evaluating the severity of alopecia in men (69.23%). Reported risk factors for early-onset AGA included a family history of AGA, cigarette smoking, unhealthy dietary habits, and a high body mass index. Early-onset AGA may also be associated with hormonal profiles, 5 $\alpha$ -reductase enzyme activity, androgen receptor genes, and some susceptibility loci. Comorbidities investigated included MetS, cardiovascular disease, insulin resistance, dyslipidemia, and Parkinson's disease. Men with early-onset AGA may have reduced treatment efficacy with drug like rosuvastatin, metformin or lisinopril for dyslipidemia,

## OPEN ACCESS

**Citation:** Liu L-P, Wariboko MA, Hu X, Wang Z-H, Wu Q, Li Y-M (2024) Factors associated with early-onset androgenetic alopecia: A scoping review. PLoS ONE 19(3): e0299212. <https://doi.org/10.1371/journal.pone.0299212>

**Editor:** Surangi Jayakody, University of Warwick, UNITED KINGDOM

**Received:** October 1, 2023

**Accepted:** February 7, 2024

**Published:** March 7, 2024

**Copyright:** © 2024 Liu et al. This is an open access article distributed under the terms of the [Creative Commons Attribution License](https://creativecommons.org/licenses/by/4.0/), which permits unrestricted use, distribution, and reproduction in any medium, provided the original author and source are credited.

**Data Availability Statement:** All relevant data are within the manuscript and its [Supporting Information](#) files.

**Funding:** This research was funded partly by the National Natural Science Foundation of China (82103766 to L.-P.L.) and Jiangsu Provincial Medical Key Discipline Cultivation Unit (JSDW202229 to Y.-M.L.). No sponsor or funder play any role in the study design, data collection and analysis, decision to publish, or preparation of the manuscript.

**Competing interests:** The authors have declared that no competing interests exist.

prediabetes, or hypertension. Additionally, young men with AGA tended to suffer from psychological issues such as anxiety and low self-esteem compared to those without hair loss.

## Conclusion

Early-onset AGA is a complex condition with various risk factors and etiology, associated comorbidities, and potential implications for treatment response and psychological health.

## Introduction

Androgenetic alopecia (AGA) is the most prevalent cause of non-scarring alopecia in adults, typically affecting the front and vertex regions in men and causing diffuse hair thinning over the central scalp in women [1]. The severity of AGA is commonly evaluated using the Hamilton–Norwood scale (HNS) in men [2] and the Ludwig classification in women [3]. Early-onset AGA is generally defined as AGA developing before the age of 30 [4, 5], 35 [6, 7] or 40 [8, 9] years; however, there is currently no unified definition. Although the frequency of AGA increases with age, the prevalence of early-onset cases is substantial, ranging from 19.2%–57.6% in different populations [10–12]. In addition to harmfully affecting the patient's appearance and quality of life [13, 14], AGA is closely associated with the risk of developing metabolic syndrome (MetS) [15, 16], which is a cluster of metabolic abnormalities including obesity, hyperlipidemia, insulin resistance (IR), and hypertension. A systematic review including 19 articles and 2,531 participants revealed a pooled odds ratio (OR) of 3.46 for the prevalence rate of MetS between individuals with AGA and controls [15]. Moreover, early-onset AGA has been associated with early markers of IR [6], carotid artery atherosclerosis [17], ischemic heart disease [18], and benign prostatic hyperplasia [19].

Considering the detrimental consequences and burden associated with these chronic disorders, more comprehensive characterization and in-depth understanding of early-onset AGA could aid in identifying individuals at high risk. This, in turn, would facilitate improved and earlier interventions, ultimately preventing long-term consequences during the early stages of life. This review aims to scope, collate and catalogue the existing literature on early-onset AGA. Specially, the focus will be on identifying risk factors and etiology, associated comorbidities and potential adverse effects on overall wellbeing.

## Methods

We used the Preferred Reporting Items for Systematic reviews and Meta-Analyses extension for Scoping Reviews (PRISMA-ScR) [20] for reporting this scoping review (S1 Table) and reported the flow of articles included in accordance with the Checklist. The study's protocol was not previously published.

## Research questions

The scoping review was guided by the following specific research questions. First, what are the risk factors associated with early-onset AGA? Second, what comorbidities are individuals with early-onset AGA at a higher risk of developing? Third, are there any additional adverse effects on patient well-being associated with early-onset AGA?

## Search strategy

Electronic literature searches were performed in MEDLINE, EMBASE and CENTRAL on July 28, 2023. The searches were conducted for studies published in the English language, without imposing any specific restrictions on the publication period. The search terms used in the database are shown in S2 Table. EndNote citation management software was utilized for managing the literature.

## Study selection

The search strategy is shown in Fig 1. The inclusion criteria for articles were as follows: 1) Research articles based on case control, cohort, cross-sectional design, or meta-analysis that clearly described the definition of “early-onset” of AGA. Individuals without alopecia or with late-onset AGA were used as controls. Studies were also included if the definition of “early-onset” was not explicitly described but all the AGA cases involved patients under the age of 40 (the maximum age limit determined according to the initial literature review) and stratified analysis was conducted based on gender, alopecia severity, or other case features; 2) Articles had to be published in English; 3) There were no restrictions on gender or the year of publication.

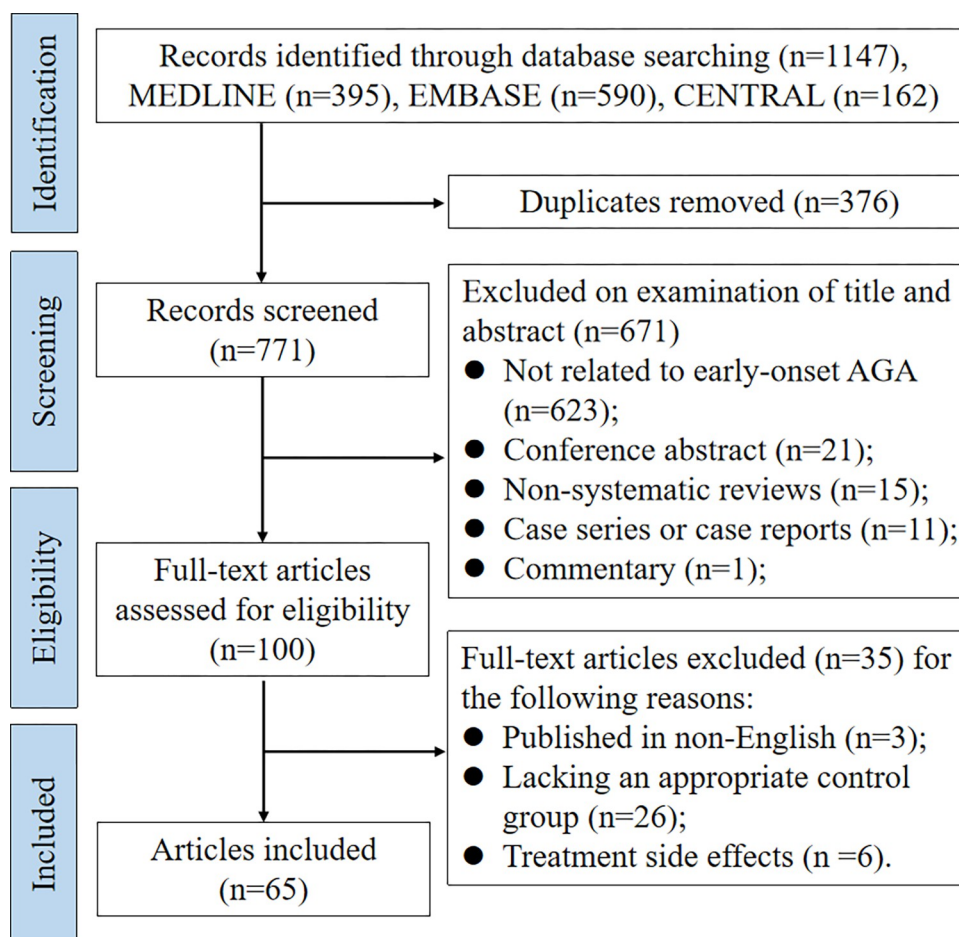

Fig 1. Search strategy and study selection.

<https://doi.org/10.1371/journal.pone.0299212.g001>

The following types of papers were excluded from this scoping review: 1) letters, editorials, commentaries, unpublished manuscripts, dissertations, government reports, books and book chapters, conference proceedings, meeting abstracts, lectures and addresses, consensus development statements; 2) case reports; 3) case series; 4) qualitative studies; 5) non-systematic reviews; 6) guideline statements; 7) protocols for proposed systematic reviews or meta-analyses; 8) animal studies; 9) cell culture studies; 10) studies on the efficiency and side effects of AGA treatment.

The literature search was performed by one investigator (Li-Ping Liu). After the duplicates were removed, two reviewers (Li-Ping Liu and Mary Adumo Wariboko) screened all titles, abstracts and full texts independently based on the inclusion and exclusion criteria and solved disagreements by discussion.

## Data extraction

The aim of this review is to systematically map and aggregate the available evidence, not to critically analyzing the quality of individual studies. Therefore, a descriptive analysis was performed to examine the characteristics of the included literature. Data extracted were summarized in a narrative report encompassing the following themes: study characteristics and methodologies (including year of publication, study region, research design, participant characteristics); findings related to the research questions (including main outcomes and study results). The key information and relevant variables were summarized in a descriptive table when necessary. Microsoft Excel and GraphPad Prism were employed for data analysis and graphing purposes.

## Results

### Study selection and data extraction

The search produced 1,147 records (MEDLINE:  $n = 395$ , EMBASE:  $n = 590$ , CENTRAL:  $n = 162$ ) (Fig 1). When duplicated studies ( $n = 376$ ) were removed, 771 studies were used for further screening. Studies were excluded if there were irrelevant ( $n = 623$ ), conference abstract ( $n = 21$ ), non-systematic reviews ( $n = 15$ ), case reports or case series ( $n = 11$ ), commentary ( $n = 1$ ), lacking an appropriate control group ( $n = 26$ ), non-English ( $n = 3$ ), or focused on treatment side effects ( $n = 6$ ). Ultimately, 65 eligible articles were identified.

### Characteristics of included studies

The majority of the studies included in this scoping review were conducted using a case-control design (67.69%,  $n = 44$ ). Some studies utilized a cross-sectional design (24.62%,  $n = 16$ ), cohort design (1.54%,  $n = 1$ ), or were systematic reviews and meta-analyses (6.15%,  $n = 4$ ). The number of published articles showed a significant increase after 2020 (Fig 2). The studies originated from 21 different countries, with the highest number of research studies conducted in India (Fig 3). The majority of studies only included male participants (78.46%,  $n = 51$ ).

### Definition of early-onset AGA and methods for severity evaluation

Among the included studies, 43.08% ( $n = 28$ ) defined “early-onset AGA” as cases developing before the age of 30 years, while 35.38% ( $n = 23$ ) included cases developing before 35 or 36 years (Fig 4). The methods applied to evaluate the severity of baldness varied. The HNS was the most frequently used in men (69.23%,  $n = 45$ ) while the Ludwig scale was predominantly used most in women (10.77%,  $n = 7$ ). In addition, the basic and specific classification (BASP) scale and the Ebling scale were each used in 4 studies, respectively.

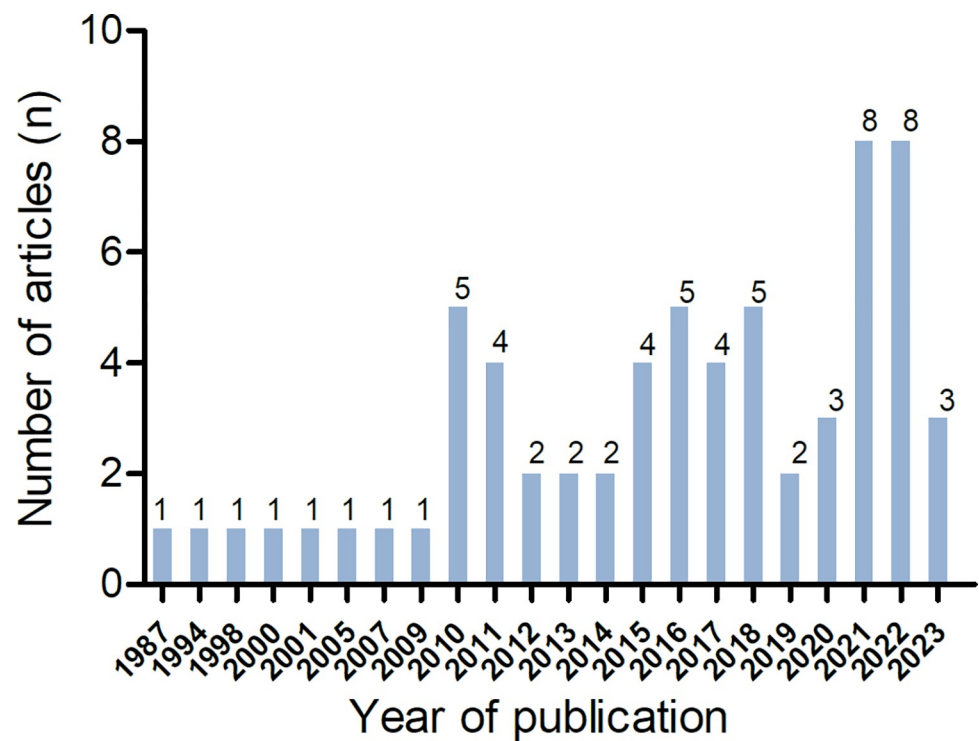

Fig 2. Number of articles published by year.

<https://doi.org/10.1371/journal.pone.0299212.g002>

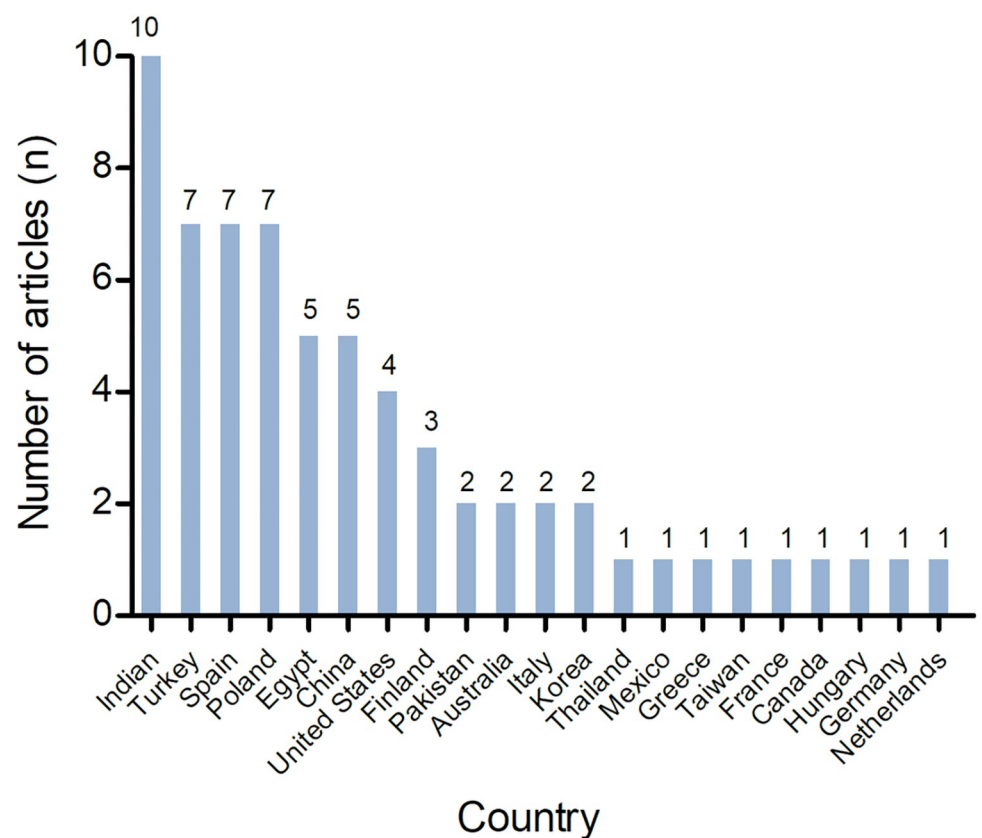

Fig 3. Number of articles published by country.

<https://doi.org/10.1371/journal.pone.0299212.g003>

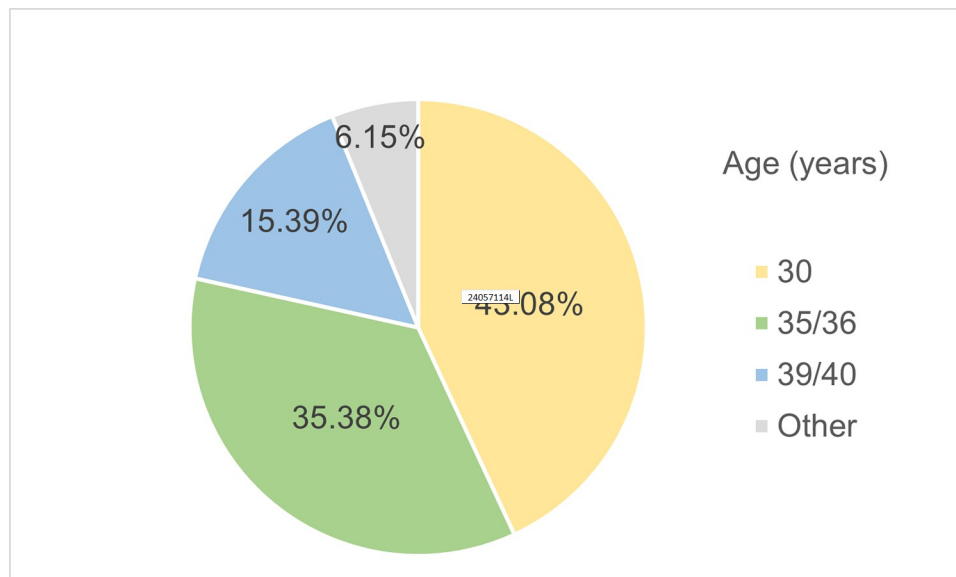

**Fig 4. Percentage of studies using age limitation for early-onset AGA.**

<https://doi.org/10.1371/journal.pone.0299212.g004>

### Topics of included studies

To address the three research questions mentioned above, the topics covered in the included studies were classified into four main categories: investigation of risk factors and etiology (23.08%,  $n = 15$ ), association with potential comorbidities (61.54%,  $n = 40$ ), medication effects related to early-onset AGA (10.77%,  $n = 7$ ) and the impacts of alopecia on patient wellbeing (6.15%,  $n = 4$ ). The last two categories focused on the potential adverse effects of early-onset AGA on patient wellbeing, with a total of 11 studies addressing this aspect.

### Risk factors and etiology of early-onset AGA

Fifteen articles focused on identifying the risk factors [5, 10, 12, 21–23] or etiology [4, 8, 24–30] for early-onset AGA. Several risk factors were found to be significantly associated with early-onset AGA. These included family history [10, 12, 23], lifestyle factors such as cigarette smoking [10, 21] and unhealthy dietary habits [10]. Additionally, severe AGA was more prevalent in men aged between 30 and 40 years with higher body mass index (BMI) [22]. For young female cases aged 15 to 18 years, predictors of early-onset AGA included irregular menses, a history of thyroid disease, and hirsutism [12].

Two studies investigated the hormonal profile of men with early-onset AGA [4, 24], considering that AGA is an androgen-mediated disease [1]. Sanke S, et al. [4] found that men with early-onset AGA had significantly elevated levels of testosterone, dehydroepiandrosterone sulfate (DHEAS), luteinizing hormone (LH), prolactin, free androgen index and LH/follicle-stimulating hormone (FSH) ratio, while mean levels of FSH and sex hormone binding globulin (SHBG) were decreased. These findings suggest that early-onset AGA in men could be considered as a phenotypic equivalent of polycystic ovary syndrome (PCOS) in women, as it causes similar hormonal changes. However, another study showed similar levels of LH, FSH and SHBG between AGA cases and the control group, although levels of serum free testosterone and dihydrotestosterone were significantly higher in AGA patients [24]. Therefore, the consistency of LH and FSH levels appears to be inconclusive.



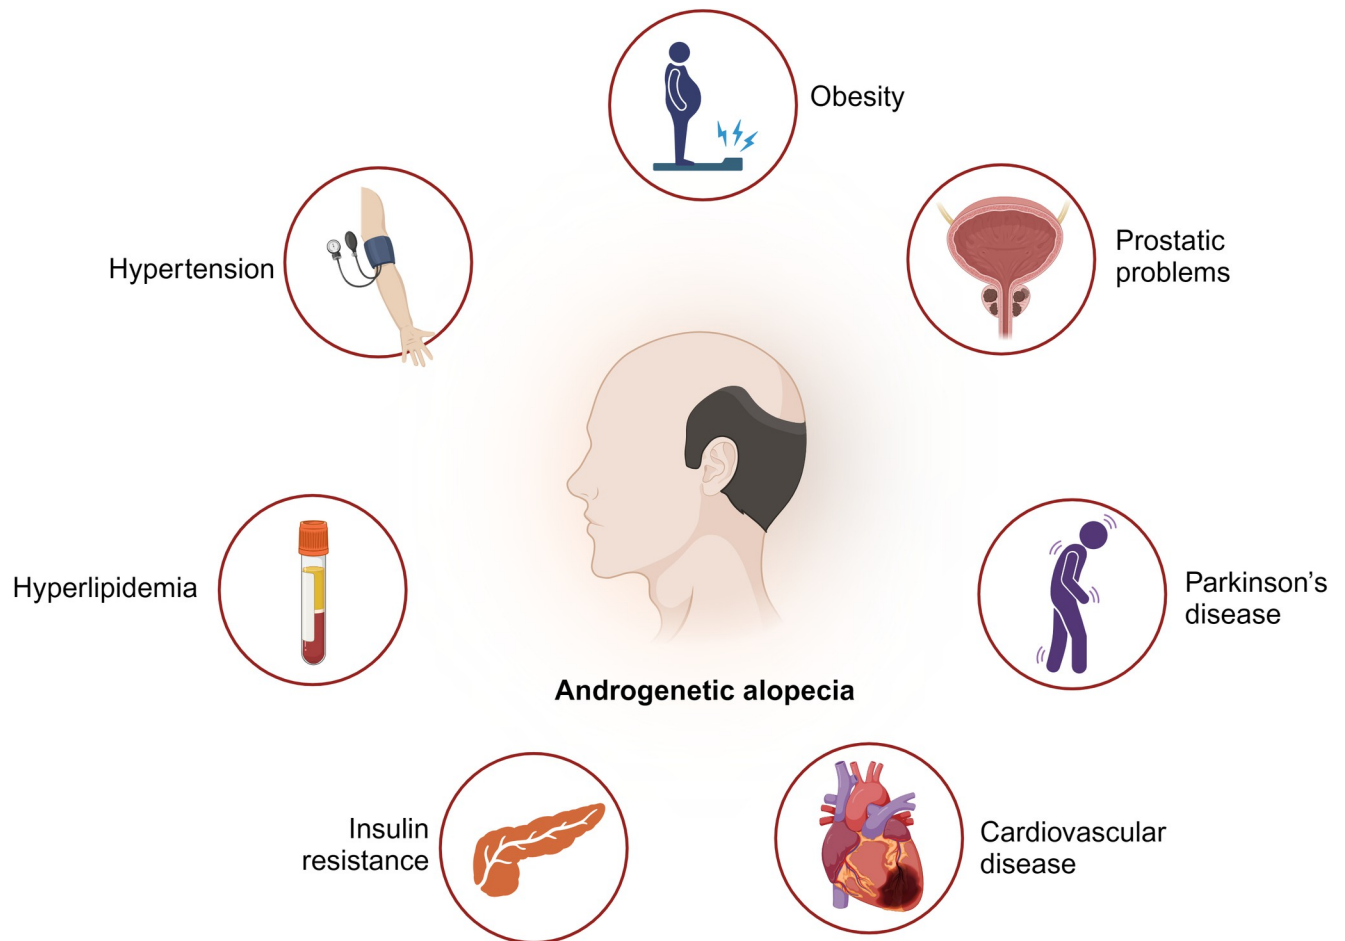

**Fig 5. Potential conditions associated with early-onset AGA.** (Created with [BioRender.com](https://BioRender.com)).

<https://doi.org/10.1371/journal.pone.0299212.g005>

Because excessive activity of 5 $\alpha$ -reductase in hair follicles is believed to be a contributing factor to AGA [31], the role of this enzyme in early-onset cases was evaluated in three studies. Among hyperandrogenic women, increased 5 $\alpha$ -reductase activity in the scalp was found to be associated with alopecia [25]. However, no statistical significance was observed in the mean mRNA levels of three types of 5 $\alpha$ -reductase isozymes in plucked hairs between women with AGA and controls [26]. Furthermore, no significant differences were found in allele, genotype, or haplotype frequencies for restriction fragment length polymorphisms of 5  $\alpha$ -reductase enzyme genes (SRD5A1 and SRD5A2) between young bald men and older non-bald men [27].

Genetic predisposition plays a crucial role in the development of AGA. Hillmer AM, et al. [28] explored the contribution of the genetic variability in androgen receptors and found that it was the cardinal prerequisite to the development of early-onset AGA. Additionally, six susceptibility loci (rs12565727, rs9287638, rs2073963, rs6945541, s12373124, rs10502861) and two AGA loci on the X chromosome and chromosome 20 were identified [8]. Moreover, forty-nine single-nucleotide polymorphisms (SNPs) located around PPARGC1A, ABCC4, CYP11B2, FSHB, and CYP19A1 were found to be significant contributors to AGA [29]. Furthermore, a genetic model was established to predict AGA risk based on SNPs identified from previous genome-wide association study [30]. The model achieved an accuracy level of 0.74 in predicting the risk of early-onset AGA. It was found that 55.8% of the genetic liability for

early-onset AGA can be attributed to common autosomal SNPs, while 23.3% is attributed to X-chromosome SNPs.

## Conditions associated with early-onset AGA

A total of 40 articles examined the potential comorbidities associated with early-onset AGA (Fig 5). The majority of them focused on the metabolic diseases ( $n = 30$ ) [6, 7, 9, 15, 17, 18, 32–55], such as MetS, cardiovascular disease (CVD), IR, dyslipidemia. Other associated conditions included prostatic hyperplasia or prostatic cancer (PC) [19, 56–58] ( $n = 4$ ), hyperuricemia [59, 60] ( $n = 2$ ), gonadal and adrenal related problems [61, 62] ( $n = 2$ ), amyotrophic lateral sclerosis [63] ( $n = 1$ ), and Parkinson's disease and fertility [8] ( $n = 1$ ) (Table 1).

While some studies did not find significant difference between AGA patients and healthy controls in terms of MetS risk [32], IR [32–34], lipid profile [34], and BMI [34], the majority of studies (72.50%,  $n = 29$ ) reported that patients with early-onset AGA had a higher risk to develop MetS [15, 17, 33, 35–44], CVD [9, 18, 40, 44–46], IR [6, 43, 47–49], hyperglycemia [50], dyslipidemia [38, 51–53], hypertension [7], high BMI and obesity [18, 54, 55, 61]. A systematic review including nine studies and 970 participants found that a younger onset age (before 36 years) was associated with a higher risk with MetS, with a pooled OR of 3.88 ( $P < 0.001$ ) [15]. Moreover, positive associations were also found between AGA severity and the risk of metabolic diseases [9, 32, 34, 46, 48, 49, 54, 55] in all but one study [42]. Two other systematic reviews indicated that early-onset cases might represent a phenotypic sign of male PCOS-equivalent [51] and be associated with an increased risk of developing Parkinson's disease [8]. Four studies focused on the link between early-onset AGA and PC development, but their results varied greatly [19, 56–58].

## Drug effects

Seven articles, conducted by the same research group in Poland, investigated whether the presence of early-onset AGA altered the efficacy of specific medications for specific disorders (Table 2). These were all case-control studies. The results showed that men with early-onset AGA may experience less benefit from rosuvastatin [64], metformin [65, 66], lisinopril [67], levothyroxine [68], Vitamin D [69], or bromocriptine [70] when treating dyslipidemia, prediabetes, hypertension, autoimmune hypothyroidism, autoimmune thyroiditis, or prolactin excess, respectively, compared to the contemporaries without alopecia. However, one exception was noted, as the impact of metformin on gonadotroph secretory function appeared to be stronger in men with early-onset AGA compared to those with normal hair growth [66].

## Impacts of early-onset AGA on patient wellbeing

Hair plays a significant role in an individual's self-image and can affect how one is perceived in social perceptions. A systematic review and meta-analysis of 41 studies with 7,995 patients

**Table 1. Conditions associated with early-onset AGA.**

| Study design                        | Publication and location | Objective                                                                                                           | Age limitation of "early-onset" & severity evaluation method | Participants characteristics                             | Results                                                                                                                                                                                                                                                          | Summary findings                                                               |
|-------------------------------------|--------------------------|---------------------------------------------------------------------------------------------------------------------|--------------------------------------------------------------|----------------------------------------------------------|------------------------------------------------------------------------------------------------------------------------------------------------------------------------------------------------------------------------------------------------------------------|--------------------------------------------------------------------------------|
| Metabolic diseases                  |                          |                                                                                                                     |                                                              |                                                          |                                                                                                                                                                                                                                                                  |                                                                                |
| Systematic Review and meta-analysis | 2022 [15]; China         | To evaluate the risk grade of MetS and the metabolic profile in patients with early-onset AGA                       | age < 36 years; N/A                                          | 503 with AGA and 467 without AGA; 880 male and 90 female | The pooled ORs for the prevalence rate of MetS between the group without and with early-onset AGA were 3.13 and 3.88, respectively ( $P < 0.001$ ).                                                                                                              | Patients with early-onset AGA had significant associations with MetS.          |
|                                     | 2017 [51]; Italy         | To evaluate the difference in the glycolipid and hormonal profiles in men with early-onset AGA compared to controls | age < 35 years; HNS                                          | 522 with AGA and 487 without AGA; male                   | Men with early-onset AGA have significant differences in glycemic profile (higher insulin serum and HOMA index), lipid profile (higher serum TC, LDL cholesterol and triglycerides), and hormonal profile (higher levels of LH and DHEAS, lower levels of SHBG). | Early-onset AGA might represent a phenotypic sign of the male PCOS-equivalent. |

(Continued)



Table 1. (Continued)

| Study design | Publication and location | Objective                                                                                                                                                                | Age limitation of "early-onset" & severity evaluation method                               | Participants characteristics                                                                          | Results                                                                                                                                                                                                                                                                                                                                                                                                                                                                                    | Summary findings                                                                                                                                                                                  |
|--------------|--------------------------|--------------------------------------------------------------------------------------------------------------------------------------------------------------------------|--------------------------------------------------------------------------------------------|-------------------------------------------------------------------------------------------------------|--------------------------------------------------------------------------------------------------------------------------------------------------------------------------------------------------------------------------------------------------------------------------------------------------------------------------------------------------------------------------------------------------------------------------------------------------------------------------------------------|---------------------------------------------------------------------------------------------------------------------------------------------------------------------------------------------------|
| Case-control | 2022 [35]; India         | To compare the prevalence of MetS in early-onset AGA patients                                                                                                            | age < 35 years; N/A                                                                        | 50 with AGA and 50 without AGA; 20 to 50 years of age; both sex                                       | 1. Two groups did not vary significantly in height and weight, glucose levels, thyroid hormone levels, blood counts, and cholesterol levels.<br>2. 26% of patients in AGA group and 6% of patients in the control group fit the criteria of MetS ( $P = 0.007$ ).<br>3. The difference in LDL and HDL values between patients and controls was significant ( $P = 0.0027$ and $0.0091$ respectively).                                                                                      | Patients with early-onset AGA are more likely to develop MetS.                                                                                                                                    |
|              | 2021 [36]; Pakistan      | To evaluate the association of early-onset AGA and MetS in young male                                                                                                    | age < 36 years; HNS grade $\geq 3$                                                         | 101 with AGA and 101 without AGA; 20–36 years of age; male                                            | There were significant differences in the mean values of serum triglycerides ( $P = 0.006$ ) and WC ( $P = 0.002$ ).                                                                                                                                                                                                                                                                                                                                                                       | A significant association was found between AGA and MetS.                                                                                                                                         |
|              | 2020 [37]; Egypt         | To detect the role of serum YKL-40 in early-onset AGA and MetS pathogenesis, onset and severity                                                                          | age < 30 years; HNS for males and Ludwig for females                                       | 70 with AGA and 30 without AGA; 18 to 50 years of age; both sex                                       | 1. Patients showed highly significant higher serum YKL-40 level more than those without AGA ( $P < 0.001$ ).<br>2. There was highly significant increase in YKL-40 level among early-onset cases compared to late-onset ones ( $P < 0.001$ ).                                                                                                                                                                                                                                              | High serum YKL-40 was considered not only a biomarker of early-onset AGA but also a potential sensitive predictor for early-onset MetS development and severity in patients with early-onset AGA. |
|              | 2019 [33]; India         | To assess the link between MetS and/or IR in men with early-onset AGA                                                                                                    | age < 30 years; HNS                                                                        | 50 with AGA and 50 without AGA; 18 to 24 years of age; male                                           | 1. 10% AGA group (5/50) and 4% without AGA group (2/50) had IR ( $P = 0.23$ ).<br>2. 30% AGA group (15/50) and 8% without AGA group (4/50) had MetS ( $P = 0.005$ ).                                                                                                                                                                                                                                                                                                                       | Male patients with early-onset AGA did not have IR. MetS was linked to early-onset AGA in male patients.                                                                                          |
|              | 2018 [38]; India         | To find the relationship between AGA and MetS                                                                                                                            | age < 30 years; HNS grade $\geq 2$                                                         | 50 AGA and 50 without AGA; 18 to 50 years of age; male                                                | 1. MetS was found in 15 (30%) patients and 6 (12%) controls. 29 patients in case and 16 in controls were dyslipidemia.<br>2. No difference was found in increased blood pressure and hyperglycemia between two groups.                                                                                                                                                                                                                                                                     | Patients with early-onset AGA tend to have a higher prevalence of MetS, particularly dyslipidemia.                                                                                                |
|              | 2017 [34]; Turkey        | To investigate the factors affecting AGA, and the relationship between AGA and IMA.                                                                                      | age < 35 years; HNS grade $\geq 3$                                                         | 50 with AGA and 30 without AGA; 18–35 years of age; male                                              | 1. There was no significant difference between participants with AGA and control in BMI, DHEAS, testosterone, lipid profile, TC, HDL, LDL, IR, and IMA.<br>2. There was a positive correlation between AGA grade and IR ( $r = 0.296$ , $P = 0.037$ ).                                                                                                                                                                                                                                     | There was a positive correlation between AGA stage and IR and there was no significant relationship between AGA and IMA.                                                                          |
|              | 2016 [40]; Turkey        | To evaluate cardiovascular risk factors in male patients with early-onset AGA                                                                                            | age < 30 years; HNS                                                                        | 51 with AGA and 17 without AGA; 18 to 55 years of age; male                                           | 1. MetS was identified in 25 with AGA and 2 without AGA participants ( $P < 0.05$ ).<br>2. The carotid intima-media thickness values in patients with vertex pattern AGA were found to be substantially greater than in patients without vertex baldness and controls ( $P < 0.05$ ). Patients' pulse-wave velocity values were considerably greater ( $P < 0.001$ ).                                                                                                                      | Early-onset AGA alone could be an independent risk factor for CVD and MetS.                                                                                                                       |
|              | 2015 [52]; Egypt         | To investigate plasma lipid profile and atherogenic index in non-obese females with AGA                                                                                  | age < 35 years; Ludwig                                                                     | 40 with AGA and 40 without AGA; 15 to 40 years of age; female                                         | 1. TC ( $P < 0.001$ ), LDL cholesterol ( $P = 0.03$ ), and triglycerides ( $P = 0.001$ ) levels were higher in AGA than in controls. The mean level of HDL cholesterol in AGA was lower than in controls ( $P = 0.008$ ).<br>2. The atherogenic index of plasma in AGA was greater than in controls ( $P < 0.001$ ).                                                                                                                                                                       | It supports the link between early-onset AGA and an unfavorable lipid profile, as well as cardiovascular risk in females.                                                                         |
|              | 2015 [17]; India         | To study the presence of MetS and carotid artery atherosclerosis in men with early-onset AGA                                                                             | age < 35 years; HNS                                                                        | 100 with AGA and 100 without AGA; 18 to 35 years of age; male                                         | 1. 22% patients with early-onset AGA met the MetS criteria, compared to 8% in control ( $P < 0.05$ ).<br>2. There were significant differences in values of WC, serum triglycerides, serum cholesterol, SBP, DBP, fasting glucose concentration, and very LDL between participants with and without AGA.<br>3. The mean levels of HDL and LDL cholesterol showed no significant changes.<br>4. The atherosclerotic plaque was discovered in two of the AGA, but not in any of the control. | AGA can be considered as an early indicator of MetS.                                                                                                                                              |
|              | 2015 [18]; Egypt         | To predict the relation between early AGA and ischemic heart disease                                                                                                     | age < 30 years; N/A                                                                        | 100 with AGA and 100 without AGA; 20–30 years of age; male                                            | 1. The BMI and WC of AGA group were significantly higher compared with control.<br>2. Statistically significant higher level in SBP, TG in AGA group, while no significant differences in DBP, HDL, LDL between two groups.<br>3. ECG found abnormal finding in AGA patient which was statistically significant.                                                                                                                                                                           | AGA could predict ischemic heart disease.                                                                                                                                                         |
|              | 2014 [41]; India         | To assess the prevalence of MetS in persons with early AGA in Indian settings.                                                                                           | age < 30 years; HNS                                                                        | 85 with AGA and 85 without AGA; less than 30 years of age; male                                       | 1. MetS was found in a greater proportion of AGA group (43.5%) than in control (2.4%) ( $P < 0.001$ ).<br>2. AGA group exhibited higher levels of triglyceride ( $P < 0.001$ ), SBP ( $P < 0.001$ ), DBP ( $P < 0.001$ ), and considerably lower HDL levels ( $P < 0.001$ ).                                                                                                                                                                                                               | MetS is linked to AGA in male Indian patients less than the age of 30.                                                                                                                            |
|              | 2013 [42]; Thailand      | To evaluate the relationship between early-onset AGA and MetS in Thai male patients.                                                                                     | age < 35 years; HNS stage $\geq 3$                                                         | 40 with AGA and 40 without AGA; less than 35 years of age; male                                       | 1. Early-onset AGA participants showed a 3.48-fold greater risk of MetS than control ( $P = 0.015$ ).<br>2. AGA severity and MetS had no connection.                                                                                                                                                                                                                                                                                                                                       | A link between early-onset AGA and MetS in Thai males was found.                                                                                                                                  |
|              | 2011 [50]; Spain         | To evaluate SHBG and blood glucose levels in patients with early-onset AGA                                                                                               | age < 35 years; Ludwig degree $\geq II$ for females and Ebling degree $\geq III$ for males | 120 with AGA and 120 without AGA; 45 to 60 years of age; both sex                                     | 1. 39.1% of AGA participants had hyperglycemia compared to 12.5% of those without AGA ( $P < 0.0001$ ).<br>2. SHBG levels in patients with AGA and hyperglycemia were lower than in those without AGA with hyperglycemia ( $P = 0.004$ ).<br>3. A robust connection between SHBG levels and glucose levels in AGA participants ( $OR = 3.35$ , $P < 0.001$ ).                                                                                                                              | A link between early-onset AGA, hyperglycemia/diabetes, and low SHBG levels was found. In AGA patients, low SHBG levels may be a sign of IR and hyperglycemia/diabetes.                           |
|              | 2011 [47]; Turkey        | To identify the presence of IR and MetS in early-onset AGA                                                                                                               | age < 30 years; HNS                                                                        | 50 with AGA and 40 without AGA; 18 to 30 years of age; male                                           | 1. Values of DBP, TC, HOMA-IR and FIRI were significantly higher in the AGA group.<br>2. No significant differences were observed in MetS diagnosis between the two groups.                                                                                                                                                                                                                                                                                                                | Male patients with early-onset AGA exhibit IR.                                                                                                                                                    |
|              | 2010 [43]; Turkey        | To examine the frequency of IR, hyperinsulinemia and MetS in early-onset AGA.                                                                                            | age < 35 years; HNS                                                                        | 80 AGA and 48 without AGA; 20 to 50 years of age; male                                                | 1. The occurrence of MetS was significantly higher in the AGA group than in the control group ( $P < 0.05$ ).<br>2. IR was detected in 25 patients with early AGA and in 6 healthy participants ( $P < 0.05$ ).                                                                                                                                                                                                                                                                            | The prevalence of IR and MetS was shown to be higher in early AGA patients.                                                                                                                       |
|              | 2010 [53]; Spain         | To analyze the lipid values in men and women with AGA                                                                                                                    | age < 35 years; Ebling degree $\geq II$ for males and Ludwig degree $\geq II$ for females  | 150 with AGA and 150 without AGA; 35 to 60 years of age; both                                         | 1. Female with AGA showed significant higher values of triglycerides ( $P = 0.006$ ), TC ( $P = 0.014$ ), LDL cholesterol ( $P = 0.0006$ ) and lower HDL cholesterol ( $P < 0.0001$ ) versus group without AGA respectively.<br>2. Men with AGA had significantly higher triglyceride levels ( $P = 0.04$ ), TC levels ( $P = 0.006$ ), and LDL-C levels ( $P = 0.0013$ ).                                                                                                                 | A significantly higher lipid levels in men and women with AGA than those without AGA was found.                                                                                                   |
|              | 2010 [7]; Spain          | To evaluate aldosterone levels and the presence of systolic and diastolic hypertension in women with early-onset AGA                                                     | age < 35 years; Ludwig degree $\geq II$                                                    | 40 with AGA and 40 without AGA; 35–55 years of age; female                                            | Patients with AGA had higher SBP ( $P < 0.0001$ ), DBP ( $P < 0.0001$ ), and aldosterone levels ( $P = 0.002$ ) than those without AGA.                                                                                                                                                                                                                                                                                                                                                    | Women with AGA have a greater frequency of hypertension.                                                                                                                                          |
|              | 2010 [44]; Spain         | To analyze the presence of cardiovascular risk factors and the prevalence of carotid atheromatosis, hormonal factors, and acute phase reactant variables in AGA patients | age < 35 years; Ebling stage $\geq III$ for males and Ludwig stage $\geq II$ for females   | 77 with AGA and 77 without AGA; 35 to 55 years of age; both sex                                       | 1. MetS was found in 60% of male AGA ( $OR = 10.5$ ), 48.6% of female AGA ( $OR = 10.73$ ), 12.5% of male without AGA, and 8.1% of female without AGA ( $P < 0.0001$ ).<br>2. Atheromatous plaques were seen in 32.5% of male AGA patients ( $OR = 5.93$ ) compared 7.5% of male without AGA ( $P = 0.005$ ) and 27% of female AGA patients ( $OR = 4.19$ ) versus 8.1% of female without AGA ( $P = 0.032$ ).                                                                             | The evaluation of MetS and an ultrasound examination of the carotid arteries may be valuable screening procedures for detecting the risk of developing CVD in patients with early-onset AGA.      |
|              | 2009 [48]; Mexico        | To study the link between AGA and IR using the HOMA-IR index or clinical signs of the MetS                                                                               | age < 35 years; HNS stage $\geq III$                                                       | 80 with AGA and 80 without AGA; 18–35 years of age; male                                              | 1. The HOMA-IR index was significantly higher in cases than controls.<br>2. Nonobese AGA cases had a higher mean DBP and a more frequent family history of AGA than nonobese controls without AGA.                                                                                                                                                                                                                                                                                         | All young males with stage III or higher AGA should be evaluated for IR and cardiovascular-related characteristics and diseases.                                                                  |
|              | 2001 [45]; Finland       | To test if the early-onset AGA is a risk factor for early severe CAD requiring surgery                                                                                   | age < 35 years; HNS grade $\geq III$ vertex                                                | 85 with a coronary revascularization procedure and 85 age-matched control; 43.5–79 years of age; male | The OR for coronary revascularization under the age of 60 years in men with early-onset AGA was 3.18 compared to males without alopecia or late AGA after multivariate adjustment for the traditional CAD risk factors. The OR at any age was 1.84.                                                                                                                                                                                                                                        | Early-onset AGA is a risk factor for an early-onset of severe coronary heart disease.                                                                                                             |
|              | 2000 [6]; Finland        | To test whether early AGA could be a clinical marker of IR                                                                                                               | age < 35 years; HNS grade $\geq III$ vertex                                                | 125 with AGA and 104 without AGA; 19–50 years of age; male                                            | Men with early-onset AGA had a strikingly increased risk of hyperinsulinemia and IR-associated disorders such as obesity, hypertension, and dyslipidemia.                                                                                                                                                                                                                                                                                                                                  | Early AGA might be an early indication of IR.                                                                                                                                                     |

(Continued)

Table 1. (Continued)

| Study design                      | Publication and location | Objective                                                                                                                                        | Age limitation of "early-onset" & severity evaluation method | Participants characteristics                                                                                                          | Results                                                                                                                                                                                                                                                                                                                                                                                                                                                                                                                                                                   | Summary findings                                                                                                                                              |
|-----------------------------------|--------------------------|--------------------------------------------------------------------------------------------------------------------------------------------------|--------------------------------------------------------------|---------------------------------------------------------------------------------------------------------------------------------------|---------------------------------------------------------------------------------------------------------------------------------------------------------------------------------------------------------------------------------------------------------------------------------------------------------------------------------------------------------------------------------------------------------------------------------------------------------------------------------------------------------------------------------------------------------------------------|---------------------------------------------------------------------------------------------------------------------------------------------------------------|
| Cross-sectional                   | 2023 [49]; India         | To ascertain the clinic-phenotypic features, and the prevalence of hormonal and metabolic alterations of males with early-onset AGA              | age < 30 years; HNS grade $\geq 3$                           | 100 with AGA (34 with altered hormonal profile and 66 with normal profile); 18–29 years of age; male                                  | 1. 34 of the 100 AGA patients had altered hormonal profiles, whereas 44 and 26 had IR and MetS, respectively.<br>2. Changes in hormone profiles were linked to IR and severe baldness.<br>3. Patients with altered hormonal profile who were IR had a substantially greater frequency of severe alopecia ( $P = 0.036$ )                                                                                                                                                                                                                                                  | Subjects with changed hormonal profiles were more likely to exhibit IR and severe grades of AGA.                                                              |
|                                   | 2022 [32]; Turkey        | To evaluate the cardiovascular and metabolic implications of early-onset AGA                                                                     | age < 30 years; HNS                                          | 41 with AGA and 40 without AGA; 24 to 45 years of age; male                                                                           | 1. ABP, hsCRP, and galectin-3 levels were similar in both groups.<br>2. In AGA patients, there was a positive relationship between HNS grade with age, BMI, triglyceride levels, and fasting blood glucose levels, daytime pulse wave velocity and nighttime reflection magnitude. There was also a substantial positive connection between hsCRP with BMI and WC, and between galectin-3 with BMI, WC, hip circumference, and HOMA-IR.                                                                                                                                   | AGA patients have IR and MetS components similar to the general population. hsCRP and galectin-3 appear to be linked to CVD risk factors in AGA patients.     |
|                                   | 2021 [9]; China          | To investigate the relationship between AGA and CAD in the Han Chinese male population.                                                          | age < 40 years; BASP                                         | 402 with suspected or confirmed CAD; 28 to 75 years of age; male                                                                      | 1. Patients with various levels of AGA had varying CAD status ( $P = 0.002$ ), dyslipidemia status ( $P = 0.002$ ), age ( $P = 0.003$ ), and coronary atherosclerosis severity ( $P < 0.001$ ).<br>2. Early-onset AGA was associated with a relative CAD risk of 2.292, while severe AGA was associated with a relative CAD risk of 2.111 ( $P = 0.016$ ).<br>3. The severity of coronary atherosclerosis was independently correlated with AGA status (OR = 2.247, $P = 0.001$ ), severe AGA (OR = 2.360, $P < 0.001$ ), and early-onset AGA (OR = 3.474, $P < 0.001$ ). | AGA is independently related with CAD in a Han Chinese male sample.                                                                                           |
|                                   | 2017 [46]; Greece        | To evaluate the connection between hypertension and target organ damage in hypertension males with and without AGA                               | age < 25 years; HNS                                          | 101 with consecutive hypertension (62 with AGA and 39 without AGA); 35–52 years of age; male                                          | 1. CFRd was considerably lower in severe AGA as compared to mild to moderate AGA participants ( $P = 0.007$ ) and non-AGA participants ( $P = 0.02$ ).<br>2. AGA severity was independently associated to CFRd and pulse pressure, whereas AGA length and age of initiation were connected to CFRd and pulse pressure, respectively                                                                                                                                                                                                                                       | Hypertension individuals with severe and early AGA development appear to be at increased cardiovascular risk.                                                 |
|                                   | 2016 [39]; India         | To study the link between MetS and early-onset AGA                                                                                               | age < 35 years; HNS                                          | 85 with AGA and 85 without AGA; 18 to 55 years of age; male                                                                           | 1. MetS was observed in 22.4% of the AGA patients and 9.4% of the controls ( $P = 0.021$ ).<br>2. Patients with AGA had substantially greater levels of abdominal obesity, hypertension, and lowered HDL compared to controls.                                                                                                                                                                                                                                                                                                                                            | Men with early-onset AGA had a greater frequency of MetS.                                                                                                     |
|                                   | 2014 [54]; Taiwan        | To determine association between BMI and alopecia severity in men with AGA                                                                       | age < 30 years; HNS                                          | 189 with AGA; 18 to 64 years of age; male                                                                                             | 1. Men with severe AGA had higher BMI than those with mild to moderate alopecia ( $P = 0.01$ ).<br>2. The risk for severe alopecia was higher in the overweight or obese subjects with AGA (OR = 3.52, $P < 0.01$ ).<br>3. In early-onset AGA, the risk for having severe alopecia was higher in the overweight or obese subjects (OR = 4.97, $P = 0.03$ ).                                                                                                                                                                                                               | Higher BMI was significantly associated with greater severity of hair loss in men with AGA, especially with early-onset AGA.                                  |
|                                   | 2007 [53]; Finland       | To examine the link between early-onset AGA and low-grade inflammation                                                                           | age < 35 years; HNS                                          | 727; 25–34 years of age; male                                                                                                         | 1. Men with moderate to extensive AGA (17%) had a higher BMI and larger circumference of upper arm, waist and hip than those with little to no alopecia ( $P < 0.05$ ).<br>2. The mean waist-to-hip circumference ratio increased with rising hsCRP, but only among males with moderate to severe AGA ( $P = 0.043$ ).                                                                                                                                                                                                                                                    | A link between moderate to severe AGA and low-grade inflammation was a predictor of future CVD, especially in males with central obesity.                     |
| Prostate related                  |                          |                                                                                                                                                  |                                                              |                                                                                                                                       |                                                                                                                                                                                                                                                                                                                                                                                                                                                                                                                                                                           |                                                                                                                                                               |
| Case-control                      | 2018 [56]; Australia     | To evaluate the associations between AGA at a young age and the development of aggressive PC.                                                    | age < 40 years; HNS                                          | 1,107 with AGA and 834 without AGA; 20–40 years of age; male                                                                          | 1. Men with very early-onset balding at age 20 years were at increased risk for subsequent aggressive PC (OR = 1.51).<br>2. The impact was strongest in males with advanced stage pT3+ disease (OR = 1.68), but men with organ-confined high-grade PC did not show the similar pattern.                                                                                                                                                                                                                                                                                   | Men with AGA at the age of 20 are more likely to develop advanced stage PC.                                                                                   |
|                                   | 2012 [19]; Spain         | To determine whether individuals with early-onset AGA had larger prostatic volumes and urine flow alterations than healthy subjects without AGA. | age < 35 years; Ebling scale type III, IV, or V              | 45 with AGA and 42 without AGA; 35–65 years of age; male                                                                              | 1. Patients with AGA had significantly higher mean prostate volume ( $P < 0.0001$ ), IPSS ( $P < 0.0001$ ), and prostate-specific antigen value ( $P < 0.0001$ ), but significantly lower maximum urinary flow ( $P < 0.0001$ ).<br>2. A strong association between the presence of AGA and benign prostatic hyperplasia (OR = 5.14, $P = 0.041$ ).                                                                                                                                                                                                                       | The presence of AGA is related with prostate growth-associated urine symptoms. Early-onset AGA may be an early indicator of urinary/prostatic symptomatology. |
|                                   | 2011 [58]; France        | To study link between early-onset AGA and risk of PC later in life                                                                               | age < 40 years; HNS                                          | 388 with PC and 281 without PC; The mean age for cases was 67.2 $\pm$ 7.2 years, while for controls it was 66.4 $\pm$ 9.1 years; male | 1. Patients with PC were twice as likely to have AGA at age 20 (OR = 2.01, $P = 0.0285$ ).<br>2. There was no link seen between early-onset AGA and earlier PC detection or the development of more aggressive tumors.                                                                                                                                                                                                                                                                                                                                                    | A link between early-onset AGA and PC development was found.                                                                                                  |
|                                   | 2010 [57]; United States | To explore the relationship between AGA and PC risk                                                                                              | age < 30 years; Self-defined                                 | 999 with PC and 942 without PC; 35–74 years of age; male                                                                              | 1. Hair loss at age 30 was more common in controls (25.2%) than cases (19.8%, $P = 0.005$ ), and those with hair loss at age 30 had a 29% relative risk reduction for PC (OR = 0.71).<br>2. In men aged over 60, the risk reduction was greater for men with hair loss at age 30 from both the top of head and forehead (OR = 0.55)                                                                                                                                                                                                                                       | Early-onset AGA was linked with a lower relative risk of PC.                                                                                                  |
| Hyperuricemia                     |                          |                                                                                                                                                  |                                                              |                                                                                                                                       |                                                                                                                                                                                                                                                                                                                                                                                                                                                                                                                                                                           |                                                                                                                                                               |
| Case-control                      | 2022 [59]; India         | To relate the prevalence of hyperuricemia and level of SUA levels in patients of early onset AGA                                                 | age < 35 years; BASP                                         | 104 with AGA and 104 without AGA; 18–35 years of age; male                                                                            | 1. SUA was higher in AGA group than in control ( $P = 0.2$ ).<br>2. AGA patients had more hyperuricemia compared to the group without AGA ( $P = 0.03$ , OR = 0.39).                                                                                                                                                                                                                                                                                                                                                                                                      | Males with early-onset AGA have higher blood uric acid levels. Hyperuricemia is more prevalent in patients with early-onset AGA than in control.              |
|                                   | 2020 [60]; China         | To determine relationship between hyperuricemia and AGA in males                                                                                 | age < 30 years; HNS grade $\geq 3$                           | 1312 with AGA and 2624 without AGA; 18–50 years of age; male                                                                          | 1. Men with AGA had higher mean uric acid levels ( $P < 0.001$ ) and greater prevalence of hyperuricemia ( $P < 0.001$ ) compared to men without AGA.<br>2. AGA severity and hyperuricemia had no statistically significant relationship ( $P = 0.295$ ).                                                                                                                                                                                                                                                                                                                 | Men with early AGA have a higher prevalence of hyperuricemia.                                                                                                 |
| Gonadal and adrenal related       |                          |                                                                                                                                                  |                                                              |                                                                                                                                       |                                                                                                                                                                                                                                                                                                                                                                                                                                                                                                                                                                           |                                                                                                                                                               |
| Case-control                      | 2020 [61]; Italy         | To assess gonadal and adrenal function in males with early-onset AGA                                                                             | age < 35 years; N/A                                          | 43 with AGA and 36 without AGA; 14–30 years of age; male                                                                              | 1. Patients with early-onset AGA exhibited higher BMI ( $P < 0.05$ ) and 17 $\alpha$ -hydroxyprogesterone ( $P < 0.05$ ).<br>2. Men with early-onset AGA with at least one of the following factors: BMI > 25 kg/m <sup>2</sup> , IR, and SHBG < 25 nmol/L have higher DHEAS levels and worse gonadal steroidogenesis.                                                                                                                                                                                                                                                    | Men with early-onset AGA may have a greater risk to develop gonadal dysfunction later in life.                                                                |
|                                   | 1987 [62]; United States | To describe link between early AGA with adrenal hyperactivity                                                                                    | age < 35 years; N/A                                          | 18 with AGA and 7 without AGA; 18–35 years of age; male                                                                               | 1. The difference in dehydroepiandrosterone sulphate levels between patients and controls was significant ( $P < 0.005$ ).<br>2. There was no statistically significant difference in serum testosterone values between patients and controls.                                                                                                                                                                                                                                                                                                                            | Hyperadrenalism may be an important element in the complex biochemistry of AGA.                                                                               |
| ALS                               |                          |                                                                                                                                                  |                                                              |                                                                                                                                       |                                                                                                                                                                                                                                                                                                                                                                                                                                                                                                                                                                           |                                                                                                                                                               |
| Cohort                            | 2013 [63]; United States | To explore the association of early-onset alopecia and ALS in men                                                                                | age < 45 years; HNS                                          | 42 men with ALS; 46–81 years of age; male                                                                                             | 1. Participants with severe alopecia were nearly three times more likely to develop ALS than those with no alopecia (relative risk = 2.74).<br>2. A strong linear trend between increasing degrees of baldness at 45 years of age and the probability of ALS ( $P = 0.02$ ).                                                                                                                                                                                                                                                                                              | An association between early-onset AGA and ALS was found.                                                                                                     |
| Parkinson's disease and fertility |                          |                                                                                                                                                  |                                                              |                                                                                                                                       |                                                                                                                                                                                                                                                                                                                                                                                                                                                                                                                                                                           |                                                                                                                                                               |

(Continued)

Table 1. (Continued)

| Study design  | Publication and location | Objective                                                            | Age limitation of "early-onset" & severity evaluation method | Participants characteristics                                  | Results                                                                                                                                                                                                                                                                                                                                                                                                                                                                                                                                                                                                     | Summary findings                                                                              |
|---------------|--------------------------|----------------------------------------------------------------------|--------------------------------------------------------------|---------------------------------------------------------------|-------------------------------------------------------------------------------------------------------------------------------------------------------------------------------------------------------------------------------------------------------------------------------------------------------------------------------------------------------------------------------------------------------------------------------------------------------------------------------------------------------------------------------------------------------------------------------------------------------------|-----------------------------------------------------------------------------------------------|
| Meta-analysis | 2012 [8]; Canada         | To detect the association between early-onset AGA and the risk of PD | age < 40 years; N/A                                          | 3,891 with AGA and 8,915 without AGA; 46–81 years of age; N/A | 1. Variants at 17q21.31 locus including the <i>MAPT</i> gene are associated with both risk of PD ( $P = 2.8 \times 10^{-12}$ ) and early onset AGA ( $P = 9.3 \times 10^{-8}$ ).<br>2. Early-onset AGA cases had significantly increased odds of subsequent PD ( $OR = 1.28$ , $P = 8.9 \times 10^{-3}$ ).<br>3. The AGA susceptibility alleles at the 17q21.31 locus on the H1 haplotype has been linked to decreased fertility. Individuals in the highest risk quartile of a genotype score had an approximately six-fold increased risk of early-onset AGA ( $OR = 5.78$ , $P = 1.4 \times 10^{-48}$ ). | Associations between early-onset AGA, Parkinson's disease, and decreased fertility was found. |

Abbreviation: AGA: androgenetic alopecia; MetS: metabolic syndrome; N/A: not applicable; OR: odds ratio; HNS: Hamilton-Norwood scale; HOMA: homeostatic model assessment; TC: total cholesterol; LDL: low density lipoprotein; LH: luteinizing hormone; DHEAS: dehydroepiandrosterone sulfate; SHBG: sex hormone binding globulin; PCOS: polycystic ovary syndrome; ABP: ambulatory blood pressure; hsCRP: high-sensitivity C-reactive protein; BMI: body mass index; WC: waist circumference; IR: insulin resistance; CVD: cardiovascular disease; HDL: high density lipoprotein; YKL: tyrosine (Y), lysine (K) and leucine (L); IMA: ischemia modified albumin; SBP: systolic blood pressures; DBP: diastolic blood pressures; TG: triglycerides; ECG: electrocardiography; FIRI: fasting insulin resistance index; CAD: coronary artery disease; BASP: basic and specific classification; CFRd: coronary flow reserve; PC: prostate cancer; IPSS: International Prostate Symptom Score; SUA: serum uric acid; ALS: amyotrophic lateral sclerosis; PD: Parkinson's disease

<https://doi.org/10.1371/journal.pone.0299212.t001>

revealed that AGA was associated with moderate impairment of both health-related quality of life and emotional wellbeing [71]. The detrimental impacts on self-esteem and specific aspects of psychological adjustment are more pronounced in women compared to men [72]. Four included studies evaluated the negative effects of alopecia on young patients [73–76]. However, all of these studies exclusively enrolled male participants. Three of these studies were descriptive cross-sectional studies focused on psychological complications. They found that young men under 30 years old affected by AGA tended to suffer from anxiety and low self-esteem compared to their peers without hair loss [73]. It is also reported that individuals with moderate to severe psychosocial morbidity may have an increased risk of sexual dysfunction [75]. Furthermore, statistically significant associations were observed between the severity of AGA and the severity of depression, loneliness, and levels of internet addiction levels [74].

## Discussion

This scoping review identified several reported risk factors for early-onset AGA, including family history, cigarette smoking, unhealthy dietary habits, high BMI, and irregular menses. Additionally, early-onset AGA may also be associated with hormonal profiles, 5 $\alpha$ -reductase enzyme activity, androgen receptor gene, and some newly discovered susceptibility loci. These results highlight the multifactorial nature of the AGA, indicating that a combination of genetic, hormonal, behavioral and lifestyle factors contribute to its development. Additionally, the available studies also demonstrated a close link between early-onset AGA and MetS, CVD, IR, and dyslipidemia. Interestingly, these chronic diseases are also strongly related to the risk factors for early-onset AGA, such as smoking [77, 78] and dietary habits [79–81]. Therefore, this emphasizes the importance of lifestyle modifications in individuals with early-onset AGA to prevent these co-existing health conditions. Furthermore, men with early-onset AGA may benefit to a lesser degree from treatments such as rosuvastatin [64], metformin [65, 66], or lisinopril [67] compared to individuals with normal hair growth. Therefore, young patients with AGA may not only be more susceptible to developing metabolic diseases, but also less responsive to certain treatments. These findings are of clinical significance because AGA can be easily recognized based on clinical features. Tailored treatment approaches may be necessary for this specific population. Overall, the findings underscore the importance of early detection, risk assessment, and comprehensive management of early-onset AGA. Both physicians and patients should consider not only the hair loss condition itself but also its potential associations with other health conditions. Compared to published systematic review and meta-analysis on

Table 2. Early-onset AGA modifies drug effects.

| Target disease & medication          | Publication and location | Objective                                                                                                                                                      | Age limitation of “early-onset” & severity evaluation method | Participants characteristics                                                                                | Results                                                                                                                                                                                                                                                                                                                                                                                                                                                                           | Summary findings                                                                                    |
|--------------------------------------|--------------------------|----------------------------------------------------------------------------------------------------------------------------------------------------------------|--------------------------------------------------------------|-------------------------------------------------------------------------------------------------------------|-----------------------------------------------------------------------------------------------------------------------------------------------------------------------------------------------------------------------------------------------------------------------------------------------------------------------------------------------------------------------------------------------------------------------------------------------------------------------------------|-----------------------------------------------------------------------------------------------------|
| Dyslipidemia treated by Rosuvastatin | 2021 [64]; Poland        | To investigate levels of cardiometabolic risk factors in HMG-CoA-treated men with early-onset AGA.                                                             | age < 30 years; HNS grade $\geq$ III vertex;                 | Patients with mixed dyslipidemia: 25 with AGA and 25 without AGA; 18 to 35 years of age; male               | 1. Rosuvastatin reduced TC, LDL cholesterol, hsCRP, and fibrinogen in both groups and the effects were more pronounced in group without AGA.<br>2. Rosuvastatin deteriorate insulin sensitivity only in group with AGA and the drug affect uric acid, homocysteine, and 25-hydroxyvitamin D only in group without AGA.                                                                                                                                                            | Males with early-onset AGA may benefit less from rosuvastatin medication than their contemporaries. |
| Diabetes treated by metformin        | 2022 [65]; Poland        | To investigate whether the presence of early-onset AGA modulates the metabolic effects of metformin.                                                           | age < 30 years; HNS grade $\geq$ III vertex                  | Men at high risk for type 2 diabetes: 72 with AGA and 75 without AGA; 25 to 50 years of age; male           | 1. Twelve-month metformin treatment reduced fat content, WC, glycated hemoglobin, glucose and triglycerides, as well as improved insulin sensitivity in both group and these effects were more pronounced in group without AGA.<br>2. Treatment-induced changes in glucose homeostasis markers correlated with the impact of metformin on hsCRP and 25-hydroxyvitamin D levels.                                                                                                   | Metabolic effects of metformin are attenuated in men with early-onset AGA.                          |
|                                      | 2022 [66]; Poland        | To determine whether the existence of elevated androgen levels in males with early-onset AGA modulates the impact of metformin on pituitary hormone production | age < 30 years; HNS grade $\geq$ III vertex                  | Patients with prediabetes: 23 with early-onset AGA and 25 without AGA; 20 to 50 years of age; male          | 1. The effect of metformin on fasting glucose, insulin sensitivity, and glycated hemoglobin was more pronounced in group without AGA than in group with AGA.<br>2. Metformin reduced LH levels and the LH/FSH ratio only in group with AGA.                                                                                                                                                                                                                                       | The impact of metformin on gonadotroph secretory function is stronger in men with early-onset AGA.  |
| Hypertension treated by lisinopril   | 2021 [67]; Poland        | To determine whether early-onset AGA in men with arterial hypertension affects the cardiometabolic consequences of lisinopril.                                 | age < 30 years; HNS grade $\geq$ III vertex                  | Patients with grade 1 hypertension: 31 with early-onset AGA and 31 without AGA; 18 to 50 years of age; male | 1. Lisinopril reduced systolic and diastolic blood pressure, UACR, hsCRP, and fibrinogen in both groups and the effects were stronger in group without AGA.<br>2. The drug decreased levels of uric acid and homocysteine, as well as improved insulin sensitivity only in group without AGA.<br>3. The impact of lisinopril on uric acid, hsCRP, fibrinogen, homocysteine, and UACR correlated weakly with its hypotensive properties, androgen levels, and insulin sensitivity. | Cardiometabolic effects of lisinopril are less pronounced in men with early-onset AGA.              |

(Continued)

Table 2. (Continued)

| Target disease & medication                        | Publication and location | Objective                                                                                                                                                                                                 | Age limitation of “early-onset” & severity evaluation method | Participants characteristics                                                                                  | Results                                                                                                                                                                                                                                                                                                                                                                                                                                                                           | Summary findings                                                                                                                                            |
|----------------------------------------------------|--------------------------|-----------------------------------------------------------------------------------------------------------------------------------------------------------------------------------------------------------|--------------------------------------------------------------|---------------------------------------------------------------------------------------------------------------|-----------------------------------------------------------------------------------------------------------------------------------------------------------------------------------------------------------------------------------------------------------------------------------------------------------------------------------------------------------------------------------------------------------------------------------------------------------------------------------|-------------------------------------------------------------------------------------------------------------------------------------------------------------|
| Autoimmune hypothyroidism treated by levothyroxine | 2021 [68]; Poland        | To examine whether early-onset AGA determines the impact of exogenous levothyroxine on thyroid autoimmunity and hypothalamic–pituitary–thyroid axis activity in young men with autoimmune hypothyroidism. | age < 30 years; HNS grade $\geq$ III vertex                  | Patients with autoimmune hypothyroidism: 24 with AGA and 24 without AGA; 18 to 40 years of age; male          | Levothyroxine decreased thyroid antibody titers, reduced thyrotropin levels and increased free thyroid hormone levels in both groups and these effects were less pronounced in the men with AGA.                                                                                                                                                                                                                                                                                  | The benefits of levothyroxine therapy in men with autoimmune hypothyroidism are less pronounced in individuals with early-onset AGA                         |
| Autoimmune thyroiditis treated by Vitamin D        | 2021 [69]; Poland        | To examine whether early-onset AGA determines the impact of exogenous vitamin D on thyroid autoimmunity and thyroid function in men with autoimmune thyroiditis.                                          | age < 30 years; HNS grade $\geq$ III vertex                  | Patients with autoimmune thyroiditis: 25 with early-onset AGA and 23 without AGA; 18 to 35 years of age; male | 1. Vitamin D reduced antibody titers in both groups but this effect was stronger in group without AGA.<br>2. Vitamin D increased SPINA-GT only in group without AGA.                                                                                                                                                                                                                                                                                                              | Euthyroid men with early-onset androgenic alopecia may benefit to a lesser degree from vitamin D treatment than other subjects with autoimmune thyroiditis. |
| Prolactin excess treated by bromocriptine          | 2023 [70]; Poland        | To determine whether early-onset AGA changes bromocriptine’s cardiometabolic consequences in males with prolactin excess.                                                                                 | age < 30 years; HNS grade $\geq$ III vertex                  | Patients with prolactin excess: 17 with AGA and 17 without AGA; 20 to 70 years of age; male                   | 1. Bromocriptine reduced prolactin, increased total and bioavailable testosterone, improved insulin sensitivity, and decreased uric acid, hsCRP, and homocysteine in both groups and the impact was stronger in group without AGA.<br>2. Bromocriptine increase HDL cholesterol and decrease triglycerides, fibrinogen, and UACR only in group without AGA.<br>3. The impact on cardiometabolic risk factors was inversely correlated with testosterone levels in group with AGA. | Men with early-onset AGA are partially resistant to the cardiometabolic effects of bromocriptine                                                            |

Abbreviation: AGA: androgenetic alopecia; HMG-CoA: 3-hydroxy-3-methylglutaryl coenzyme A; HNS: Hamilton-Norwood scale; TC: total cholesterol; LDL: low density lipoprotein; hsCRP: high-sensitivity C-reactive protein; WC: waist circumference; LH: luteinizing hormone; FSH: follicle-stimulating hormone; UACR: urinary albumin-to-creatinine ratio; SPINA: structure parameter inference approach; HDL: high density lipoprotein.

<https://doi.org/10.1371/journal.pone.0299212.t002>

early-onset AGA, this scoping review provides a more comprehensive understanding of AGA by examining multiple perspectives. It goes beyond focusing solely on a specific factor [51] or the correlation with a specific disease [15], offering a more holistic view of AGA.

Several limitations should be noted. Firstly, our inclusion criteria only considered articles published in English, which may introduce publication bias and limit the generalizability of our findings. Secondly, the quality of included studies were not appraised, which could potentially include studies with lower methodological quality. Thirdly, lack of data synthesis may limit the ability to provide precise statistical information and draw conclusive inferences from the results. Lastly, the heterogeneity in study design, the definition of “early-onset” and

methodologies used for AGA evaluation among the included studies can also be considered limitations. The lack of standardized criteria and inconsistency may introduce variability in the findings and make comparisons between studies challenging.

## Conclusion

These findings indicate that early-onset AGA has a complex and multifactorial cause, and it may serve as an indicator of underlying systemic health issues. Furthermore, certain drug treatments may be less effective in men with early-onset AGA, highlighting the importance of considering AGA in the management of these conditions. Additionally, the impact of AGA on psychological well-being should be emphasized in young men.

## Supporting information

**S1 Table. PRISMA-ScR-Checklist.**  
(DOCX)

**S2 Table. Search strategy.**  
(DOCX)

**S3 Table. Dataset of eligible articles.**  
(XLSX)

## Author Contributions

**Conceptualization:** Li-Ping Liu, Yu-Mei Li.

**Data curation:** Li-Ping Liu, Mary Adumo Wariboko.

**Formal analysis:** Xiao Hu, Qian Wu.

**Funding acquisition:** Li-Ping Liu, Yu-Mei Li.

**Investigation:** Li-Ping Liu, Mary Adumo Wariboko, Xiao Hu, Zi-Han Wang.

**Methodology:** Li-Ping Liu, Mary Adumo Wariboko.

**Project administration:** Li-Ping Liu.

**Supervision:** Yu-Mei Li.

**Validation:** Xiao Hu.

**Visualization:** Qian Wu.

**Writing – original draft:** Li-Ping Liu, Mary Adumo Wariboko, Xiao Hu, Zi-Han Wang.

**Writing – review & editing:** Li-Ping Liu, Yu-Mei Li.

## References

1. Devjani S, Ezemma O, Kelley KJ, Stratton E, Senna M. Androgenetic Alopecia: Therapy Update. *Drugs*. 2023; 83:701–15. <https://doi.org/10.1007/s40265-023-01880-x> PMID: 37166619
2. Guarrera M, Cardo P, Arrigo P, Rebora A. Reliability of hamilton-norwood classification. *International journal of trichology*. 2009; 1:120–2. <https://doi.org/10.4103/0974-7753.58554> PMID: 20927233
3. Ludwig E. Classification of the types of androgenetic alopecia (common baldness) occurring in the female sex. *The British journal of dermatology*. 1977; 97:247–54. <https://doi.org/10.1111/j.1365-2133.1977.tb15179.x> PMID: 921894
4. Sanke S, Chander R, Jain A, Garg T, Yadav P. A Comparison of the Hormonal Profile of Early Androgenetic Alopecia in Men With the Phenotypic Equivalent of Polycystic Ovarian Syndrome in Women.



- JAMA dermatology. 2016; 152:986–91. <https://doi.org/10.1001/jamadermatol.2016.1776> PMID: 27304785
5. Kaya Erdogan H, Bulur I, Kocaturk E, Yildiz B, Saracoglu ZN, Alatas O. The role of oxidative stress in early-onset androgenetic alopecia. *Journal of cosmetic dermatology*. 2017; 16:527–30. <https://doi.org/10.1111/jocd.12300> PMID: 27987270
  6. Matilainen V, Koskela P, Keinanen-Kiukaanniemi S. Early androgenetic alopecia as a marker of insulin resistance. *Lancet*. 2000; 356:1165–6. [https://doi.org/10.1016/S0140-6736\(00\)02763-X](https://doi.org/10.1016/S0140-6736(00)02763-X) PMID: 11030300
  7. Arias-Santiago S, Gutierrez-Salmeron MT, Buendia-Eisman A, Giron-Prieto MS, Naranjo-Sintes R. Hypertension and aldosterone levels in women with early-onset androgenetic alopecia. *The British journal of dermatology*. 2010; 162:786–9. <https://doi.org/10.1111/j.1365-2133.2009.09588.x> PMID: 19906217
  8. Li R, Brockschmidt FF, Kiefer AK, Stefansson H, Nyholt DR, Song K, et al. Six novel susceptibility Loci for early-onset androgenetic alopecia and their unexpected association with common diseases. *PLoS genetics*. 2012; 8:e1002746. <https://doi.org/10.1371/journal.pgen.1002746> PMID: 22693459
  9. Wang YX, Chen XW, Wang SB, Gu LF, Li YF, Ma Y, et al. Association Between Androgenic Alopecia and Coronary Artery Disease: A Cross-Sectional Study of Han Chinese Male Population. *International journal of general medicine*. 2021; 14:4809–18. <https://doi.org/10.2147/IJGM.S326812> PMID: 34475775
  10. Agaoglu E, Kaya Erdogan H, Acer E, Atay E, Metintas S, Saracoglu ZN. Prevalence of early-onset androgenetic alopecia and its relationship with lifestyle and dietary habits. *Italian journal of dermatology and venereology*. 2021; 156:675–80. <https://doi.org/10.23736/S2784-8671.21.06874-7> PMID: 33913667
  11. Shi X, Tuan H, Na X, Yang H, Yang Y, Zhang Y, et al. The Association between Sugar-Sweetened Beverages and Male Pattern Hair Loss in Young Men. *Nutrients*. 2023;15.
  12. Youssef SME, Atallah RB, Zaky MS, Eldeek BS, Elsaie ML. Urban-rural differences in the prevalence of female pattern hair loss among secondary school girls: A cross-sectional study. *Journal of cosmetic dermatology*. 2022; 21:2229–35. <https://doi.org/10.1111/jocd.14373> PMID: 34358392
  13. Elsaie LT, Elshahid AR, Hasan HM, Soultan F, Jafferany M, Elsaie ML. Cross sectional quality of life assessment in patients with androgenetic alopecia. *Dermatologic therapy*. 2020; 33:e13799. <https://doi.org/10.1111/dth.13799> PMID: 32520416
  14. Gupta S, Goyal I, Mahendra A. Quality of Life Assessment in Patients with Androgenetic Alopecia. *International journal of trichology*. 2019; 11:147–52. [https://doi.org/10.4103/ijt.ijt\\_6\\_19](https://doi.org/10.4103/ijt.ijt_6_19) PMID: 31523105
  15. Qiu Y, Zhou X, Fu S, Luo S, Li Y. Systematic Review and Meta-analysis of the Association Between Metabolic Syndrome and Androgenetic Alopecia. *Acta dermato-venereologica*. 2022; 102:adv00645. <https://doi.org/10.2340/actadv.v101.1012> PMID: 34935992
  16. Lie C, Liew CF, Oon HH. Alopecia and the metabolic syndrome. *Clinics in dermatology*. 2018; 36:54–61. <https://doi.org/10.1016/j.clindermatol.2017.09.009> PMID: 29241753
  17. Banger HS, Malhotra SK, Singh S, Mahajan M. Is Early Onset Androgenic Alopecia a Marker of Metabolic Syndrome and Carotid Artery Atherosclerosis in Young Indian Male Patients? *International journal of trichology*. 2015; 7:141–7. <https://doi.org/10.4103/0974-7753.171566> PMID: 26903742
  18. Mohamed NE, Elkhazragy YA, Tawfeek NAE, Hammad WA. Early Androgenetic Alopecia as a Predictor of Ischemic Heart Disease. *American Journal of Dermatology and Venereology*. 2015; 4:18–25.
  19. Arias-Santiago S, Arrabal-Polo MA, Buendia-Eisman A, Arrabal-Martin M, Gutierrez-Salmeron MT, Giron-Prieto MS, et al. Androgenetic alopecia as an early marker of benign prostatic hyperplasia. *Journal of the American Academy of Dermatology*. 2012; 66:401–8. <https://doi.org/10.1016/j.jaad.2010.12.023> PMID: 21835498
  20. Tricco AC, Lillie E, Zarin W, O'Brien KK, Colquhoun H, Levac D, et al. PRISMA Extension for Scoping Reviews (PRISMA-ScR): Checklist and Explanation. *Annals of internal medicine*. 2018; 169:467–73. <https://doi.org/10.7326/M18-0850> PMID: 30178033
  21. Salem AS, Ibrahim HS, Abdelaziz HH, Elsaie ML. Implications of cigarette smoking on early-onset androgenetic alopecia: A cross-sectional Study. *Journal of cosmetic dermatology*. 2021; 20:1318–24. <https://doi.org/10.1111/jocd.13727> PMID: 32946667
  22. Avital YS, Morvay M, Gaaland M, Kemeny L. Study of the International Epidemiology of Androgenetic Alopecia in Young Caucasian Men Using Photographs From the Internet. *Indian journal of dermatology*. 2015; 60:419. <https://doi.org/10.4103/0019-5154.160507> PMID: 26288425
  23. Lee WS, Oh Y, Ji JH, Park JK, Kim DW, Sim WY, et al. Analysis of familial factors using the basic and specific (BASP) classification in Korean patients with androgenetic alopecia. *Journal of the American Academy of Dermatology*. 2011; 65:40–7. <https://doi.org/10.1016/j.jaad.2010.05.005> PMID: 21453986

24. Zhang Y, Xu J, Jing J, Wu X, Lv Z. Serum Levels of Androgen-Associated Hormones Are Correlated with Curative Effect in Androgenic Alopecia in Young Men. *Medical science monitor: international medical journal of experimental and clinical research*. 2018; 24:7770–7. <https://doi.org/10.12659/MSM.913116> PMID: 30376555
25. Legro RS, Carmina E, Stanczyk FZ, Gentzsch E, Lobo RA. Alterations in androgen conjugate levels in women and men with alopecia. *Fertility and sterility*. 1994; 62:744–50. [https://doi.org/10.1016/s0015-0282\(16\)56999-4](https://doi.org/10.1016/s0015-0282(16)56999-4) PMID: 7926083
26. Sanchez P, Serrano-Falcon C, Torres JM, Serrano S, Ortega E. 5alpha-Reductase isozymes and aromatase mRNA levels in plucked hair from young women with female pattern hair loss. *Archives of dermatological research*. 2018; 310:77–83.
27. Ellis JA, Stebbing M, Harrap SB. Genetic analysis of male pattern baldness and the 5alpha-reductase genes. *The Journal of investigative dermatology*. 1998; 110:849–53. <https://doi.org/10.1046/j.1523-1747.1998.00224.x> PMID: 9620288
28. Hillmer AM, Hanneken S, Ritzmann S, Becker T, Freudenberg J, Brockschmidt FF, et al. Genetic variation in the human androgen receptor gene is the major determinant of common early-onset androgenetic alopecia. *American journal of human genetics*. 2005; 77:140–8. <https://doi.org/10.1086/431425> PMID: 15902657
29. Ohn J, Son HY, Yu DA, Kim MS, Kwon S, Park WS, et al. Early onset female pattern hair loss: A case-control study for analyzing clinical features and genetic variants. *Journal of dermatological science*. 2022; 106:21–8. <https://doi.org/10.1016/j.jdermsci.2022.02.011> PMID: 35279334
30. Liu F, Hamer MA, Heilmann S, Herold C, Moebus S, Hofman A, et al. Prediction of male-pattern baldness from genotypes. *European journal of human genetics: EJHG*. 2016; 24:895–902.
31. Sawaya ME, Price VH. Different levels of 5alpha-reductase type I and II, aromatase, and androgen receptor in hair follicles of women and men with androgenetic alopecia. *The Journal of investigative dermatology*. 1997; 109:296–300. <https://doi.org/10.1111/1523-1747.ep12335779> PMID: 9284093
32. Sozen M, Baldane S, Abusoglu S, Kebapcilar L, Kebapcilar A, Tunccez Akyurek F, et al. A study on relationship between androgenetic alopecia and cardiovascular risk using high sensitivity C-reactive protein and galectin-3 in men with early onset baldness. *Biomarkers: biochemical indicators of exposure, response, and susceptibility to chemicals*. 2022; 27:71–8. <https://doi.org/10.1080/1354750X.2021.2013539> PMID: 34852684
33. Swaroop MR, Kumar BM, Sathyanarayana BD, Yogesh D, Raghavendra JC, Kumari P. The Association of Metabolic Syndrome and Insulin Resistance in Early-Onset Androgenetic Alopecia in Males: A Case-Control Study. *Indian journal of dermatology*. 2019; 64:23–7. [https://doi.org/10.4103/ijd.IJD\\_724\\_16](https://doi.org/10.4103/ijd.IJD_724_16) PMID: 30745631
34. Hülya N, Selçuk N, Zeynep KK, Feride ÇG, Betül D. Evaluation of ischemia-modified albumin level and parameters related with oxidative stress in early onset androgenetic alopecia. *Turkderm-Turk Arch Dermatol Venereology*. 2017; 51:115–8.
35. Prodip S, Karunamoy C, Sudeshna M, Loknath G, Debabrata B. Association of metabolic syndrome with early-onset androgenetic alopecia: a case-control study. *Iran J Dermatol*. 2022; 25:106–10.
36. Sheikh FZ, Butt G, Hafeez R, Maqsood A, Altaf F, Hussain I. Association of Early-onset Androgenetic Alopecia and Metabolic Syndrome. *Journal of the College of Physicians and Surgeons—Pakistan: JCPSP*. 2021; 31:123–7.
37. Elhabak DM, Abdel Halim WA. YKL-40 A Sensitive Biomarker for Early Androgenetic Alopecia and Early Hidden Metabolic Syndrome. *International journal of trichology*. 2020; 12:49–55. [https://doi.org/10.4103/ijt.ijt\\_100\\_19](https://doi.org/10.4103/ijt.ijt_100_19) PMID: 32684675
38. Mahtab A, Syed SA, Mohammad A, Mohd M, Sabha M, Annu P. Prevalence of Metabolic Syndrome and its Components in Early Onset Androgenetic Alopecia: A Case Control Study from a North Indian Tertiary Care Hospital. *Turkiye Klinikleri J Dermatol* 2018; 28:87–92.
39. Gopinath H, Upadya GM. Metabolic syndrome in androgenic alopecia. *Indian journal of dermatology, venereology and leprology*. 2016; 82:404–8. <https://doi.org/10.4103/0378-6323.174421> PMID: 27279298
40. Ertas R, Orscelik O, Kartal D, Dogan A, Ertas SK, Aydogdu EG, et al. Androgenetic alopecia as an indicator of metabolic syndrome and cardiovascular risk. *Blood pressure*. 2016; 25:141–8. <https://doi.org/10.3109/08037051.2015.1111021> PMID: 26585114
41. Chakrabarty S, Hariharan R, Gowda D, Suresh H. Association of premature androgenetic alopecia and metabolic syndrome in a young Indian population. *International journal of trichology*. 2014; 6:50–3. <https://doi.org/10.4103/0974-7753.138586> PMID: 25191037
42. Pengsalae N, Tanglertsampan C, Phichawong T, Lee S. Association of early-onset androgenetic alopecia and metabolic syndrome in Thai men: a case-control study. *Journal of the Medical Association of Thailand = Chotmaihet thangphaet*. 2013; 96:947–51. PMID: 23991602

43. Acibucu F, Kayatas M, Candan F. The association of insulin resistance and metabolic syndrome in early androgenetic alopecia. *Singapore medical journal*. 2010; 51:931–6. PMID: [21221497](#)
44. Arias-Santiago S, Gutierrez-Salmeron MT, Castellote-Caballero L, Buendia-Eisman A, Naranjo-Sintes R. Androgenetic alopecia and cardiovascular risk factors in men and women: a comparative study. *Journal of the American Academy of Dermatology*. 2010; 63:420–9. <https://doi.org/10.1016/j.jaad.2009.10.018> PMID: [20619491](#)
45. Matilainen VA, Makinen PK, Keinanen-Kiukaanniemi SM. Early onset of androgenetic alopecia associated with early severe coronary heart disease: a population-based, case-control study. *Journal of cardiovascular risk*. 2001; 8:147–51. <https://doi.org/10.1177/174182670100800305> PMID: [11455846](#)
46. Triantafyllidi H, Grafakos A, Ikonomidis I, Pavlidis G, Triviliou P, Schoinas A, et al. Severity of Alopecia Predicts Coronary Changes and Arterial Stiffness in Untreated Hypertensive Men. *Journal of clinical hypertension*. 2017; 19:51–7. <https://doi.org/10.1111/jch.12871> PMID: [27365213](#)
47. Mumcuoglu C, Ekmekci TR, Ucak S. The investigation of insulin resistance and metabolic syndrome in male patients with early-onset androgenetic alopecia. *European journal of dermatology: EJD*. 2011; 21:79–82.
48. Gonzalez-Gonzalez JG, Mancillas-Adame LG, Fernandez-Reyes M, Gomez-Flores M, Lavallo-Gonzalez FJ, Ocampo-Candiani J, et al. Androgenetic alopecia and insulin resistance in young men. *Clinical endocrinology*. 2009; 71:494–9. <https://doi.org/10.1111/j.1365-2265.2008.03508.x> PMID: [19094069](#)
49. Vinay K, Bhattachajee R, Bishnoi A, Kaushik A, Sachdeva N, Pal A, et al. Clinical and metabolic characteristics of males with early-onset androgenetic alopecia. *Indian journal of dermatology, venereology and leprology*. 2023; 89:530–5. [https://doi.org/10.25259/IJDVL\\_949\\_2021](https://doi.org/10.25259/IJDVL_949_2021) PMID: [36688892](#)
50. Arias-Santiago S, Gutierrez-Salmeron MT, Buendia-Eisman A, Giron-Prieto MS, Naranjo-Sintes R. Sex hormone-binding globulin and risk of hyperglycemia in patients with androgenetic alopecia. *Journal of the American Academy of Dermatology*. 2011; 65:48–53. <https://doi.org/10.1016/j.jaad.2010.05.002> PMID: [21511365](#)
51. Cannarella R, La Vignera S, Condorelli RA, Calogero AE. Glycolipid and Hormonal Profiles in Young Men with Early-Onset Androgenetic Alopecia: A meta-analysis. *Scientific reports*. 2017; 7:7801. <https://doi.org/10.1038/s41598-017-08528-3> PMID: [28798373](#)
52. Bakry OA, El Farargy SM, Ghanayem N, Soliman A. Atherogenic index of plasma in non-obese women with androgenetic alopecia. *International journal of dermatology*. 2015; 54:e339–44. <https://doi.org/10.1111/ijd.12783> PMID: [26096895](#)
53. Arias-Santiago S, Gutierrez-Salmeron MT, Buendia-Eisman A, Giron-Prieto MS, Naranjo-Sintes R. A comparative study of dyslipidaemia in men and woman with androgenic alopecia. *Acta dermato-venereologica*. 2010; 90:485–7. <https://doi.org/10.2340/00015555-0926> PMID: [20814623](#)
54. Yang CC, Hsieh FN, Lin LY, Hsu CK, Sheu HM, Chen W. Higher body mass index is associated with greater severity of alopecia in men with male-pattern androgenetic alopecia in Taiwan: a cross-sectional study. *Journal of the American Academy of Dermatology*. 2014; 70:297–302 e1. <https://doi.org/10.1016/j.jaad.2013.09.036> PMID: [24184140](#)
55. Hirsso P, Rajala U, Hiltunen L, Jokelainen J, Keinanen-Kiukaanniemi S, Nayha S. Obesity and low-grade inflammation among young Finnish men with early-onset alopecia. *Dermatology*. 2007; 214:125–9. <https://doi.org/10.1159/000098570> PMID: [17341860](#)
56. Papa NP, MacInnis RJ, English DR, Bolton D, Davis ID, Lawrentschuk N, et al. Early-onset baldness and the risk of aggressive prostate cancer: findings from a case-control study. *Cancer causes & control: CCC*. 2018; 29:93–102. <https://doi.org/10.1007/s10552-017-0981-0> PMID: [29139043](#)
57. Wright JL, Page ST, Lin DW, Stanford JL. Male pattern baldness and prostate cancer risk in a population-based case-control study. *Cancer epidemiology*. 2010; 34:131–5. <https://doi.org/10.1016/j.canep.2010.02.003> PMID: [20206591](#)
58. Yassa M, Saliou M, De Rycke Y, Hemery C, Henni M, Bachaud JM, et al. Male pattern baldness and the risk of prostate cancer. *Annals of oncology: official journal of the European Society for Medical Oncology*. 2011; 22:1824–7. <https://doi.org/10.1093/annonc/mdq695> PMID: [21324955](#)
59. Ghoshal L, Biswas R, Sarkar D. Is early onset androgenetic alopecia related to hyperuricemia? A case control study. *Biomedicine*. 2022; 42:1281–4.
60. Ma J, Sheng Y, Lao Z, Zhao J, Yang Q. Hyperuricemia is associated with androgenetic alopecia in men: A cross-sectional case-control study. *Journal of cosmetic dermatology*. 2020; 19:3122–6. <https://doi.org/10.1111/jocd.13401> PMID: [32281237](#)
61. Cannarella R, Condorelli RA, Dall'Oglio F, La Vignera S, Mongioi LM, Micali G, et al. Increased DHEAS and Decreased Total Testosterone Serum Levels in a Subset of Men with Early-Onset Androgenetic Alopecia: Does a Male PCOS-Equivalent Exist? *International journal of endocrinology*. 2020; 2020:1942126. <https://doi.org/10.1155/2020/1942126> PMID: [32148484](#)

62. Pitts RL. Serum elevation of dehydroepiandrosterone sulfate associated with male pattern baldness in young men. *Journal of the American Academy of Dermatology*. 1987; 16:571–3. [https://doi.org/10.1016/s0190-9622\(87\)70075-9](https://doi.org/10.1016/s0190-9622(87)70075-9) PMID: 2950147
63. Fondell E, Fitzgerald KC, Falcone GJ, O'Reilly EJ, Ascherio A. Early-onset alopecia and amyotrophic lateral sclerosis: a cohort study. *American journal of epidemiology*. 2013; 178:1146–9. <https://doi.org/10.1093/aje/kwt096> PMID: 23942216
64. Krysiak R, Basiak M, Okopien B. Cardiometabolic Risk Factors in Rosuvastatin-Treated Men with Mixed Dyslipidemia and Early-Onset Androgenic Alopecia. *Molecules*. 2021;26.
65. Krysiak R, Kowalcze K, Okopien B. Impaired metabolic effects of metformin in men with early-onset androgenic alopecia. *Pharmacological reports: PR*. 2022; 74:216–28. <https://doi.org/10.1007/s43440-021-00347-8> PMID: 34897595
66. Krysiak R, Kowalcze K, Okopien B. Pituitary Effects of Metformin in Men With Early-Onset Androgenic Alopecia. *Journal of clinical pharmacology*. 2022; 62:1364–71. <https://doi.org/10.1002/jcph.2088> PMID: 35603693
67. Krysiak R, Basiak M, Okopien B. Impact of Lisinopril on Cardiometabolic Risk Factors in Men With Hypertension and Early-onset Androgenetic Alopecia: A Pilot Study. *Journal of cardiovascular pharmacology*. 2021; 78:e738–e42. <https://doi.org/10.1097/FJC.0000000000001113> PMID: 34321400
68. Krysiak R, Kowalcze K, Marek B, Okopien B. The impact of levothyroxine on thyroid autoimmunity and hypothalamic-pituitary-thyroid axis activity in men with autoimmune hypothyroidism and early-onset androgenetic alopecia. *Endokrynologia Polska*. 2021; 72:498–504. <https://doi.org/10.5603/EP.a2021.0071> PMID: 34378784
69. Krysiak R, Kowalcze K, Okopien B. The impact of exogenous vitamin D on thyroid autoimmunity in euthyroid men with autoimmune thyroiditis and early-onset androgenic alopecia. *Pharmacological reports: PR*. 2021; 73:1439–47.
70. Krysiak R, Basiak M, Szkrobka W, Okopien B. Impaired Cardiometabolic Effects of Bromocriptine in Men With Early-Onset Androgenic Alopecia. *Journal of clinical pharmacology*. 2023; 63:345–51. <https://doi.org/10.1002/jcph.2163> PMID: 36222207
71. Huang CH, Fu Y, Chi CC. Health-Related Quality of Life, Depression, and Self-esteem in Patients With Androgenetic Alopecia: A Systematic Review and Meta-analysis. *JAMA dermatology*. 2021; 157:963–70. <https://doi.org/10.1001/jamadermatol.2021.2196> PMID: 34232264
72. Cash TF. The psychosocial consequences of androgenetic alopecia: a review of the research literature. *The British journal of dermatology*. 1999; 141:398–405. <https://doi.org/10.1046/j.1365-2133.1999.03030.x> PMID: 10583042
73. DANYAL M, SHAH SIA, HASSAN MSU, QURESHI W. Impact of Androgenetic Alopecia on the Psychological Health of young men. *Pakistan Journal of Medical & Health Sciences* 2018; 12:406–10.
74. Prasanna H TSR, SK K, Kk A, Kiran M, Reddy M. The Association of Depression, Loneliness, and Internet Addiction Levels in Male Bachelor of Medicine, Bachelor of Surgery (MBBS) Students With Androgenetic Alopecia Male Pattern Baldness in a Medical College in Kolar, India. *Cureus*. 2023; 15:e35607. <https://doi.org/10.7759/cureus.35607> PMID: 37007329
75. Molina-Leyva A, Caparros-Del Moral I, Gomez-Avivar P, Alcalde-Alonso M, Jimenez-Moleon JJ. Psychosocial Impairment as a Possible Cause of Sexual Dysfunction among Young Men with Mild Androgenetic Alopecia: A Cross-sectional Crowdsourcing Web-based Study. *Acta dermatovenerologica Croatica: ADC*. 2016; 24:42–8. PMID: 27149130
76. Qu Q, Miao Y, Guo ZH, Feng CB, Chen Q, Liu Y, et al. Types of hairline recession in androgenetic alopecia and perceptions of aging in Asian males. *International journal of dermatology*. 2019; 58:1191–6. <https://doi.org/10.1111/ijd.14423> PMID: 30888056
77. Sun K, Liu J, Ning G. Active smoking and risk of metabolic syndrome: a meta-analysis of prospective studies. *PloS one*. 2012; 7:e47791. <https://doi.org/10.1371/journal.pone.0047791> PMID: 23082217
78. Wang J, Bai Y, Zeng Z, Wang J, Wang P, Zhao Y, et al. Association between life-course cigarette smoking and metabolic syndrome: a discovery-replication strategy. *Diabetology & metabolic syndrome*. 2022; 14:11. <https://doi.org/10.1186/s13098-022-00784-2> PMID: 35033177
79. Castro-Barquero S, Ruiz-Leon AM, Sierra-Perez M, Estruch R, Casas R. Dietary Strategies for Metabolic Syndrome: A Comprehensive Review. *Nutrients*. 2020;12.
80. Fan H, Wang Y, Ren Z, Liu X, Zhao J, Yuan Y, et al. Mediterranean diet lowers all-cause and cardiovascular mortality for patients with metabolic syndrome. *Diabetology & metabolic syndrome*. 2023; 15:107. <https://doi.org/10.1186/s13098-023-01052-7> PMID: 37221569
81. Rochlani Y, Pothineni NV, Kovelamudi S, Mehta JL. Metabolic syndrome: pathophysiology, management, and modulation by natural compounds. *Therapeutic advances in cardiovascular disease*. 2017; 11:215–25. <https://doi.org/10.1177/1753944717711379> PMID: 28639538
