# Supplementary material for: Factors associated with early-onset androgenetic alopecia: A scoping review
Source: PLoS One. 2024 Mar 7;19(3):e0299212. doi: 10.1371/journal.pone.0299212 (PMC10919688; doi:10.1371/journal.pone.0299212)
Supplement: S3 Table — (XLSX) [file pone.0299212.s003.xlsx]

## Sheet: Sheet1
Year published	Title	Author	Study design	Country	Participant number	Participant gender	Participant age	Age limitation of "early-onset"	Severity evaluation method of AGA	Topic	Categories
1987	Serum elevation of dehydroepiandrosterone sulfate associated with male pattern baldness in young men.	Pitts RL.	Case-control	United States	18 with AGA and 7 without AGA;	Male	18-35 years	35	H/A	Dehydroepiandrosterone sulfate	Potential comorbidities
1994	Alterations in androgen conjugate levels in women and men with alopecia.	Legro RS, Carmina E, Stanczyk FZ, Gentzschein E, Lobo RA.	Case-control	United States	20 females with alopecia and 60 without; 10 males with alopecia and 10 without;	Both	18-30 years	30	HNS	Androgen conjugate levels	Etiology
1998	Genetic analysis of male pattern baldness and the 5alpha-reductase genes.	Ellis JA, Stebbing M, Harrap SB.	Case-control	Australia	58 young bald men and 114 older nonbald men	Male	18-30 years;50-70 years	30	HNS	Genetic analysis	Etiology
2000	Early androgenetic alopecia as a marker of insulin resistance	Matilainen V, Koskela P, Keinanen-Kiukaanniemi S.	Case-control	Finland	125 with AGA and 104 without AGA;	Male	19-50 years	35	HNS	Insulin resistance	Potential comorbidities
2001	Early onset of androgenetic alopecia associated with early severe coronary heart disease: a population-based, case-control study.	Matilainen VA, Makinen PK, Keinanen-Kiukaanniemi SM.	Case-control	Finland	85 with a coronary revascularization procedure and 85 age-matched control;	Male	43.5-79 years	35	HNS	Coronary heart disease	Potential comorbidities
2005	Genetic variation in the human androgen receptor gene is the major determinant of common early-onset androgenetic alopecia.	Hillmer AM, Hanneken S, Ritzmann S, Becker T, Freudenberg J, Brockschmidt FF, et al.	Case-control	Germany	198 males with early-onset AGA, 188 control individuals,and 157 unaffected individual	Male	<40 years; >60 years	40	HNS	Genetic variability in androgen receptors gene	Etiology
2007	Obesity and low-grade inflammation among young Finnish men with early-onset alopecia.	Hirsso P, Rajala U, Hiltunen L, Jokelainen J, Keinanen-Kiukaanniemi S, Nayha S.	Cross-sectional	Finland	727;	Male	25-34 years;	35	HNS	Obesity and low-grade inflammation	Potential comorbidities
2009	Androgenetic alopecia and insulin resistance in young men.	Gonzalez-Gonzalez JG, Mancillas-Adame LG, Fernandez-Reyes M, Gomez-Flores M, Lavalle-Gonzalez FJ, Ocampo-Candiani J, et al.	Case-control	Mexico	80 with AGA and 80 without AGA;	Male	18-35 years	35	HNS	Insulin resistance	Potential comorbidities
2010	The association of insulin resistance and metabolic syndrome in early androgenetic alopecia.	Acibucu F, Kayatas M, Candan F.	Case-control	Turkey	80 AGA and 48 without AGA;	Male	20-50 years	35	HNS	Insulin resistance and metabolic syndrome	Potential comorbidities
2010	Androgenetic alopecia and cardiovascular risk factors in men and women: a comparative study.	Arias-Santiago S, Gutierrez-Salmeron MT, Castellote-Caballero L, Buendia-Eisman A, Naranjo-Sintes R.	Case-control	Spain	77 with AGA and 77 without AGA;	Both	35-55 years	35	Ebling for males and Ludwig for females	Cardiovascular risk factors	Potential comorbidities
2010	A comparative study of dyslipidaemia in men and woman with androgenic alopecia.	Arias-Santiago S, Gutierrez-Salmeron MT, Buendia-Eisman A, Giron-Prieto MS, Naranjo-Sintes R.	Case-control	Spain	150 with AGA and 150 without AGA;	Both	35-60 years	35	Ebling for males and Ludwigfor females	Dyslipidaemia	Potential comorbidities
2010	Hypertension and aldosterone levels in women with early-onset androgenetic alopecia.	Arias-Santiago S, Gutierrez-Salmeron MT, Buendia-Eisman A, Giron-Prieto MS, Naranjo-Sintes R.	Case-control	Spain	40 with AGA and 40 without AGA;	Female	35-55 years	35	Ludwig	Hypertension and aldosterone levels	Potential comorbidities
2010	Male pattern baldness and prostate cancer risk in a population-based case-control study.	Wright JL, Page ST, Lin DW, Stanford JL.	Case-control	United States	999 with prostate cancer and 942 without;	Male	35-74 years	30	Self-defined	Prostate cancer risk	Potential comorbidities
2011	Analysis of familial factors using the basic and specific (BASP) classification in Korean patients with androgenetic alopecia.	Lee WS, Oh Y, Ji JH, Park JK, Kim DW, Sim WY, et al.	Cross-sectional	Korea	998 male and 222 female	Both	N/A	30	BASP	Familial factors	Etiology
2011	The investigation of insulin resistance and metabolic syndrome in male patients with early-onset androgenetic alopecia.	Mumcuoglu C, Ekmekci TR, Ucak S.	Case-control	Turkey	50 with AGA and 40 without AGA;	Male	18-30 years	30	HNS	Insulin resistance and metabolic syndrome	Potential comorbidities
2011	Sex hormone-binding globulin and risk of hyperglycemia in patients with androgenetic alopecia	Arias-Santiago S, Gutierrez-Salmeron MT, Buendia-Eisman A, Giron-Prieto MS, Naranjo-Sintes R.	Case-control	Spain	120 with AGA and 120 without AGA;	Both	45-60 years	35	Ebling for males and Ludwig for females	SHBG and blood glucose levels	Potential comorbidities
2011	Male pattern baldness and the risk of prostate cancer.	Yassa M, Saliou M, De Rycke Y, Hemery C, Henni M, Bachaud JM, et al.	Case-control	France	388 with prostate cancer and 281 without;	Male	The mean age for cases was 67.2±7.2 years, while for controls it was 66.4±9.1 years.	40	HNS	Prostate cancer risk	Potential comorbidities
2012	Androgenetic alopecia as an early marker of benign prostatic hyperplasia.	Arias-Santiago S, Arrabal-Polo MA, Buendia-Eisman A, Arrabal-Martin M, Gutierrez-Salmeron MT, Giron-Prieto MS, et al.	Case-control	Spain	45 with AGA and 42 without AGA;	Male	35-65 years	35	Ebling	Prostatic hyperplasia	Potential comorbidities
2012	Six novel susceptibility Loci for early-onset androgenetic alopecia and their unexpected association with common diseases.	Li R, Brockschmidt FF, Kiefer AK, Stefansson H, Nyholt DR, Song K, et al.	Meta-analysis	Canada	3,891 with AGA and 8,915 without AGA	N/A	46-81 years	40	N/A	Parkinson’s disease and fertility; Susceptibility loci	Etiology & potential comorbidities
2013	Association of early-onset androgenetic alopecia and metabolic syndrome in Thai men: a case-control study.	Pengsalae N, Tanglertsampan C, Phichawong T, Lee S.	Case-control	Thailand	40 with AGA and 40 without AGA;	Male	<35 years	35	HNS	Metabolic syndrome	Potential comorbidities
2013	Early-onset alopecia and amyotrophic lateral sclerosis: a cohort study.	Fondell E, Fitzgerald KC, Falcone GJ, O'Reilly EJ, Ascherio A.	Cohort	United States	51,529 health; 42 men with amyotrophic lateral sclerosis;	Male	46-81 years	45	HNS	Amyotrophic lateral sclerosis	Potential comorbidities
2014	Association of premature androgenetic alopecia and metabolic syndrome in a young Indian population.	Chakrabarty S, Hariharan R, Gowda D, Suresh H.	Case-control	India	85 with AGA and 85 without AGA;	Male	< 30 years	30	HNS	Metabolic syndrome	Potential comorbidities
2014	Higher body mass index is associated with greater severity of alopecia in men with male-pattern androgenetic alopecia in Taiwan: a cross-sectional study.	Yang CC, Hsieh FN, Lin LY, Hsu CK, Sheu HM, Chen W.	Cross-sectional	Taiwan	189 with AGA;	Male	18-64 years	30	HNS	Body mass index	Potential comorbidities
2015	Is Early Onset Androgenic Alopecia a Marker of Metabolic Syndrome and Carotid Artery Atherosclerosis in Young Indian Male Patients?	Banger HS, Malhotra SK, Singh S, Mahajan M.	Case-control	India	100 with AGA and 100 without AGA;	Male	18-35 years	35	HNS	Metabolic syndrome and carotid artery atherosclerosis	Potential comorbidities
2015	Early Androgenetic Alopecia as a Predictor of Ischemic Heart Disease.	Mohamed NE, Elkhazragy YA, Tawfeek NAE, Hammad WA.	Case-control	Egypt	100 with AGA and 100 without AGA;	Male	20-30 years	30	N/A	Ischemic heart disease	Potential comorbidities
2015	Study of the International Epidemiology of Androgenetic Alopecia in Young Caucasian Men Using Photographs From the Internet.	Avital YS, Morvay M, Gaaland M, Kemeny L.	Cross-sectional	Hungary	26,340 Caucasian	Male	30-40 years	40	HNS	Risk factors	Etiology
2015	Atherogenic index of plasma in non-obese women with androgenetic alopecia.	Bakry OA, El Farargy SM, Ghanayem N, Soliman A.	Case-control	Egypt	40 with AGA and 40 without AGA;	Female	15-40 years	35	Ludwig	Lipid profile and atherogenic index of plasma	Potential comorbidities
2016	A Comparison of the Hormonal Profile of Early Androgenetic Alopecia in Men With the Phenotypic Equivalent of Polycystic Ovarian Syndrome in Women.	Sanke S, Chander R, Jain A, Garg T, Yadav P.	Case-control	India	57 with AGA and 32 without AGA	Male	19-30 years	30	HNS	Hormonal profile of men with early AGA	Etiology
2016	Prediction of male-pattern baldness from genotypes.	Liu F, Hamer MA, Heilmann S, Herold C, Moebus S, Hofman A, et al.	Meta-analysis	Netherlands	2725	Male	early-onset: <40 years; elderly: mean age 67.79 years; middle-aged: mean age 49.05 years	40	HNS	Genetic model for the estimation of AGA risk	Etiology
2016	Metabolic syndrome in androgenic alopecia.	Gopinath H, Upadya GM.	Cross-sectional	India	85 with AGA and 85 without AGA;	Male	18-55 years	35	HNS	Metabolic syndrome	Potential comorbidities
2016	Androgenetic alopecia as an indicator of metabolic syndrome and cardiovascular risk.	Ertas R, Orscelik O, Kartal D, Dogan A, Ertas SK, Aydogdu EG, et al.	Case-control	Turkey	51 with AGA and 17 without AGA;	Male	18-55 years	30	HNS	Metabolic syndrome and cardiovascular risk	Potential comorbidities
2016	Psychosocial Impairment as a Possible Cause of Sexual Dysfunction among Young Men with Mild Androgenetic Alopecia: A Cross-sectional Crowdsourcing Web-based Study.	Molina-Leyva A, Caparros-Del Moral I, Gomez-Avivar P, Alcalde-Alonso M, Jimenez-Moleon JJ.	Cross-sectional	Spain	190 with AGA	Male	18-40 years	40	HNS	Sexual function	Impacts on patient wellbeing
2017	The role of oxidative stress in early-onset androgenetic alopecia.	Kaya Erdogan H, Bulur I, Kocaturk E, Yildiz B, Saracoglu ZN, Alatas O.	Case-control	Turkey	33 with AGA and 30 healthy	Male	18-30 years	30	HNS	Oxidative stress status	Etiology
2017	Evaluation of ischemia-modified albumin level and parameters related with oxidative stress in early onset androgenetic alopecia.	Hülya N, Selçuk N, Zeynep KK, Feride ÇG, Betül D.	Case-control	Turkey	50 with AGA and 30 without AGA;	Male	18-35 years	35	HNS	Ischemia modified albumin	Potential comorbidities
2017	Severity of Alopecia Predicts Coronary Changes and Arterial Stiffness in Untreated Hypertensive Men.	Triantafyllidi H, Grafakos A, Ikonomidis I, Pavlidis G, Trivilou P, Schoinas A, et al.	Cross-sectional	Greece	101 with consecutive hypertension;	Male	35-52 years	25	HNS	Coronary changes and arterial stiffness	Potential comorbidities
2017	Glycolipid and Hormonal Profiles in Young Men with Early-Onset Androgenetic Alopecia: A meta-analysis.	Cannarella R, La Vignera S, Condorelli RA, Calogero AE.	Systematic Review and meta-analysis	Italy	522 with AGA and 487 without AGA;	Male	<35 years	35	HNS	Glycolipid and hormonal profles	Potential comorbidities
2018	Serum Levels of Androgen-Associated Hormones Are Correlated with Curative Effect in Androgenic Alopecia in Young Men.	Zhang Y, Xu J, Jing J, Wu X, Lv Z.	Case-control	China	178 with AGA and 61 controls	Male	20-30 years	30	HNS	Androgen-associated hormones	Etiology
2018	5alpha-Reductase isozymes and aromatase mRNA levels in plucked hair from young women with female pattern hair loss.	Sanchez P, Serrano-Falcon C, Torres JM, Serrano S, Ortega E.	Case-control	Spain	10 women with alopecia and 7 healthy controls	Female	20-30 years	30	Ludwig	5α-Reductase isozymes and aromatase mRNA levels in hair	Etiology
2018	Prevalence of Metabolic Syndrome and its Components in Early Onset Androgenetic Alopecia: A Case Control Study from a North Indian Tertiary Care Hospital.	Mahtab A, Syed SA, Mohammad A, Mohd M, Sabha M, Annu P.	Case-control	India	50 AGA and 50 without AGA;	Male	18-50 years	30	HNS	Metabolic syndrome	Potential comorbidities
2018	Early-onset baldness and the risk of aggressive prostate cancer: findings from a case-control study.	Papa NP, MacInnis RJ, English DR, Bolton D, Davis ID, Lawrentschuk N, et al.	Case-control	Australia	1,107 with AGA and 834 without AGA;	Male	20-40 years	40	HNS	Prostate cancer	Potential comorbidities
2018	Impact of Androgenetic Alopecia on the Psychological Health of young men.	DANYAL M, SHAH SIA, HASSAN MSU, QURESHI W.	Cross-sectional	Pakistan	90	Male	20-30 years	30	HNS	Psychological health	Impacts on patient wellbeing
2019	The Association of Metabolic Syndrome and Insulin Resistance in Early-Onset Androgenetic Alopecia in Males: A Case-Control Study.	Swaroop MR, Kumar BM, Sathyanarayana BD, Yogesh D, Raghavendra JC, Kumari P.	Case-control	India	50 with AGA and 50 without AGA;	Male	18-24 years	30	HNS	Metabolic Syndrome and Insulin Resistance	Potential comorbidities
2019	Types of hairline recession in androgenetic alopecia and perceptions of aging in Asian males.	Qu Q, Miao Y, Guo ZH, Feng CB, Chen Q, Liu Y, et al.	Cross-sectional	China	30	Male	21-50 years	N/A	BASP	Effect of frontal recession on the perceived facial age	Impacts on patient wellbeing
2020	YKL-40 A Sensitive Biomarker for Early Androgenetic Alopecia and Early Hidden Metabolic Syndrome.	Elhabak DM, Abdel Halim WA.	Case-control	Egypt	70 with AGA and 30 without AGA	Both	18-50 years	30	HNS for males and Ludwig for females	Metabolic syndrome	Potential comorbidities
2020	Hyperuricemia is associated with androgenetic alopecia in men: A cross-sectional case-control study.	Ma J, Sheng Y, Lao Z, Zhao J, Yang Q.	Case-control	China	1312 with AGA and 2624 without AGA;	Male	18-50 years	30	HNS	Hyperuricemia	Potential comorbidities
2020	Increased DHEAS and Decreased Total Testosterone Serum Levels in a Subset of Men with Early-Onset Androgenetic Alopecia: Does a Male PCOS-Equivalent Exist?	Cannarella R, Condorelli RA, Dall'Oglio F, La Vignera S, Mongioi LM, Micali G, et al.	Case-control	Italy	43 with AGA and 36 without AGA;	Male	14-30 years	35	N/A	Gonadal and adrenal function	Potential comorbidities
2021	Prevalence of early-onset androgenetic alopecia and its relationship with lifestyle and dietary habits.	Agaoglu E, Kaya Erdogan H, Acer E, Atay E, Metintas S, Saracoglu ZN.	Cross-sectional	Turkey	1507 male students	Male	18-30 years	30	HNS	Family history, lifestyle and dietary habits	Etiology
2021	Implications of cigarette smoking on early-onset androgenetic alopecia: A cross-sectional Study.	Salem AS, Ibrahim HS, Abdelaziz HH, Elsaie ML.	Cross-sectional	Egypt	500 smokers and 500 non-smokers	Male	20-35 years	35	HNS	Association with smoking	Etiology
2021	Association of Early-onset Androgenetic Alopecia and Metabolic Syndrome.	Sheikh FZ, Butt G, Hafeez R, Maqsood A, Altaf F, Hussain I.	Case-control	Pakistan	101 with AGA and 101 without AGA	Male	20-36 years	36	HNS	Metabolic syndrome	Potential comorbidities
2021	Association Between Androgenic Alopecia and Coronary Artery Disease: A Cross-Sectional Study of Han Chinese Male Population.	Wang YX, Chen XW, Wang SB, Gu LF, Li YF, Ma Y, et al.	Cross-sectional	China	402 with suspected or confirmed CAD;	Male	28-75 years	40	BASP	Coronary artery disease	Potential comorbidities
2021	Cardiometabolic Risk Factors in Rosuvastatin-Treated Men with Mixed Dyslipidemia and Early-Onset Androgenic Alopecia.	Krysiak R, Basiak M, Okopien B.	Case-control	Poland	25 with AGA and 25 without AGA;	Male	18-35 years	30	HNS	Cardiometabolic risk factors and dyslipidemia	Medications’ effects
2021	Impact of Lisinopril on Cardiometabolic Risk Factors in Men With Hypertension and Early-onset Androgenetic Alopecia: A Pilot Study.	Krysiak R, Basiak M, Okopien B.	Case-control	Poland	31 with early-onset AGA and 31 without AGA;	Male	18-50 years	30	HNS	Hypertension	Medications’ effects
2021	The impact of levothyroxine on thyroid autoimmunity and hypothalamic-pituitary-thyroid axis activity in men with autoimmune hypothyroidism and early-onset androgenetic alopecia.	Krysiak R, Kowalcze K, Marek B, Okopien B.	Case-control	Poland	24 with AGA and 24 without AGA	Male	18-40 years	30	HNS	Autoimmune hypothyroidism	Medications’ effects
2021	The impact of exogenous vitamin D on thyroid autoimmunity in euthyroid men with autoimmune thyroiditis and early-onset androgenic alopecia.	Krysiak R, Kowalcze K, Okopien B.	Case-control	Poland	25 with early-onset AGA and 23 without AGA;	Male	18-35 years	30	HNS	Autoimmune thyroiditis	Medications’ effects
2022	Systematic Review and Meta-analysis of the Association Between Metabolic Syndrome and Androgenetic Alopecia.	Qiu Y, Zhou X, Fu S, Luo S, Li Y.	Systematic Review and meta-analysis	China	503 with AGA and 467 without AGA;	Both	The mean age was between 24.32 and 45.60 years	36	N/A	Metabolic syndrome	Potential comorbidities
2022	Urban-rural differences in the prevalence of female pattern hair loss among secondary school girls: A cross-sectional study.	Youssef SME, Atallah RB, Zaky MS, Eldeek BS, Elsaie ML.	Cross-sectional	Egypt	3405 adolescent females	Female	15-18 years	N/A	N/A	Possible associated factors	Etiology
2022	Early onset female pattern hair loss: A case-control study for analyzing clinical features and genetic variants.	Ohn J, Son HY, Yu DA, Kim MS, Kwon S, Park WS, et al.	Case-control	Korea	63 women with alopecia and 341 controls	Female	<39 years	39	N/A	Clinical features and genetic characteristics	Etiology
2022	A study on relationship between androgenetic alopecia and cardiovascular risk using high sensitivity C-reactive protein and galectin-3 in men with early onset baldness.	Sozen M, Baldane S, Abusoglu S, Kebapcilar L, Kebapcilar A, Tuncez Akyurek F, et al.	Cross-sectional	Turkey	41 with AGA and 40 without AGA;	Male	24-45 years	30	HNS	Cardiovascular risk	Potential comorbidities
2022	Association of metabolic syndrome with early-onset androgenetic alopecia: a case-control study.	Prodip S, Karunamoy C, Sudeshna M, Loknath G, Debabrata B.	Case-control	India	50 with AGA and 50 without AGA;	Both	20-50 years	35	N/A	Metabolic syndrome	Potential comorbidities
2022	Is early onset androgenetic alopecia related to hyperuricemia?	Ghoshal L, Biswas R, Sarkar D.	Case-control	India	104 with AGA and 104 without AGA;	Male	18-35 years	35	BASP	Hyperuricemia	Potential comorbidities
2022	Impaired metabolic effects of metformin in men with early-onset androgenic alopecia.	Krysiak R, Kowalcze K, Okopien B.	Case-control	Poland	72 with AGA and 75 without AGA;	Male	25-50 years	30	HNS	Type 2 diabetes	Medications’ effects
2022	Pituitary Effects of Metformin in Men With Early-Onset Androgenic Alopecia.	Krysiak R, Kowalcze K, Okopien B.	Case-control	Poland	23 with early-onset AGA and 25 without AGA;	Male	20-50 years	30	HNS	Prediabetes	Medications’ effects
2023	Clinical and metabolic characteristics of males with early-onset androgenetic alopecia.	Vinay K, Bhattachajee R, Bishnoi A, Kaushik A, Sachdeva N, Pal A, et al.	Cross-sectional	India	34 with altered hormonal profile and 66 with normal	Male	18-29 years	30	HNS	Clinical and metabolic characteristics	Potential comorbidities
2023	Impaired Cardiometabolic Effects of Bromocriptine in Men With Early-Onset Androgenic Alopecia.	Krysiak R, Basiak M, Szkrobka W, Okopien B.	Case-control	Poland	17 with AGA and 17 without AGA;	Male	20-70 years	30	HNS	Prolactin excess	Medications’ effects
2023	The Association of Depression, Loneliness, and Internet Addiction Levels in Male Bachelor of Medicine, Bachelor of Surgery (MBBS) Students With Androgenetic Alopecia Male Pattern Baldness in a Medical College in Kolar, India.	Prasanna H, T SR, K SK, Kk A, Kiran M, Reddy M.	Cross-sectional	India	100	Male	18-24 years	N/A	HNS	Depression, loneliness, and internet addiction levels	Impacts on patient wellbeing
Year of publication	Number of papers	Country	Number of papers	Study design	Number of papers	Age limitation of "early-onset" (years)	Number of papers	Gender	Number of papers	Method of evaluation for AGA	Number of papers	Topics categories	Number of papers
1987	1	Indian	10	Case-control	44	30	28	Male	51	HNS	45	Etiology exploration	15
1994	1	Turkey	7	Cross-sectional	16	35/36	23	Female	5	Ludwig	7	Potential comorbidities	40
1998	1	Spain	7	Systematic Review and meta-analysis	4	39/40	10	Both	8	BASP	4	Medication's effects influenced by early-onset AGA	7
2000	1	Poland	7	Cohort	1	Other	4	N/A	1	Ebling	4	Impacts of alopecia on patient wellbeing	4
2001	1	Egypt	5							Other	9
2005	1	China	5
2007	1	United States	4
2009	1	Finland	3
2010	5	Pakistan	2
2011	4	Australia	2
2012	2	Italy	2
2013	2	Korea	2
2014	2	Thailand	1
2015	4	Mexico	1
2016	5	Greece	1
2017	4	Taiwan	1
2018	5	France	1
2019	2	Canada	1
2020	3	Hungary	1
2021	8	Germany	1
2022	8	Netherlands	1
2023	3
